# Supplementary material for: Ewing’s Sarcoma: An Analysis of miRNA Expression Profiles and Target Genes in Paraffin-Embedded Primary Tumor Tissue
Source: MDPI journal article supplement (doi:10.3390/ijms17050656), 2016-04-30
Supplement: s1 [file s1]

| id    | GeneID | miRNA name                                                                                            | Exact Mann-Whitney U test |                   | FC           | >1.2 | <0.5 |
|-------|--------|-------------------------------------------------------------------------------------------------------|---------------------------|-------------------|--------------|------|------|
|       |        |                                                                                                       | uncorrected p-value       | corrected p-value |              |      |      |
| m_1   | 35816  | LET-7B: HSA-LET-7B; MMU-LET-7B; RNO-LET-7B                                                            | 0.0453604                 | 0.26352255        | 1.70097572   | 1    | 0    |
| m_2   | 35817  | LET-7C: HSA-LET-7C; MMU-LET-7C; RNO-LET-7C                                                            | 0.2100508                 | 0.37319709        | 1.254791889  | 1    | 0    |
| m_3   | 35830  | MIR-125B: HSA-MIR-125B; MMU-MIR-125B-5P; RNO-MIR-125B-5P                                              | 0.134952                  | 0.33830435        | 1.387844006  | 1    | 0    |
| m_4   | 35837  | MIR-130A: HSA-MIR-130A; MMU-MIR-130A; RNO-MIR-130A                                                    | 0.0227743                 | 0.20936437        | 1.802940185  | 1    | 0    |
| m_5   | 35843  | MIR-136: HSA-MIR-136; RNO-MIR-136; MMU-MIR-136                                                        | 0.7368718                 | 0.74501407        | -0.639622245 | 0    | 1    |
| m_6   | 35855  | MIR-145: HSA-MIR-145; MMU-MIR-145; RNO-MIR-145                                                        | 0.8273292                 | 0.6413477         | -1.105659124 | 0    | 1    |
| m_7   | 35868  | MIR-17: HSA-MIR-17; MMU-MIR-17; RNO-MIR-17 (RNO-MIR-17-5P)                                            | 0.1825711                 | 0.35355029        | 1.2141355029 | 1    | 0    |
| m_8   | 35869  | MIR-181A: HSA-MIR-181A; MMU-MIR-181A; RNO-MIR-181A                                                    | 0.0227743                 | 0.20936437        | 3.483396018  | 1    | 0    |
| m_9   | 35879  | MIR-195: HSA-MIR-195; MMU-MIR-195; RNO-MIR-195                                                        | 0.0453604                 | 0.26352255        | 2.364840938  | 1    | 0    |
| m_10  | 35883  | MIR-21: HSA-MIR-21; MMU-MIR-21; RNO-MIR-21                                                            | 0.0133634                 | 0.20936437        | 2.162445617  | 1    | 0    |
| m_11  | 35884  | MIR-210: HSA-MIR-210; MMU-MIR-210; RNO-MIR-210                                                        | 0.0071523                 | 0.20936437        | 2.037000568  | 1    | 0    |
| m_12  | 35885  | MIR-181A*: HSA-MIR-181A*; MMU-MIR-181A-1*; RNO-MIR-181A-1*                                            | 0.0811218                 | 0.31253233        | 1.394557287  | 1    | 0    |
| m_13  | 35887  | MIR-23A: HSA-MIR-23A; MMU-MIR-23A; RNO-MIR-23A                                                        | 0.0291737                 | 0.20936437        | 1.557042028  | 1    | 0    |
| m_14  | 35888  | MIR-23B: HSA-MIR-23B; MMU-MIR-23B; RNO-MIR-23B                                                        | 0.0291737                 | 0.20936437        | 1.316642538  | 1    | 0    |
| m_15  | 35893  | MIR-27A: HSA-MIR-27A; MMU-MIR-27A; RNO-MIR-27A                                                        | 0.0227743                 | 0.20936437        | 1.646126413  | 1    | 0    |
| m_16  | 35894  | MIR-27B: HSA-MIR-27B; MMU-MIR-27B; RNO-MIR-27B                                                        | 0.0291737                 | 0.20936437        | 1.701162712  | 1    | 0    |
| m_17  | 35899  | MIR-30B: HSA-MIR-30B; MMU-MIR-30B; RNO-MIR-30B                                                        | 0.0291737                 | 0.20936437        | 2.119594446  | 1    | 0    |
| m_18  | 35900  | MIR-30C: HSA-MIR-30C; MMU-MIR-30C; RNO-MIR-30C                                                        | 0.0453604                 | 0.26352255        | 1.546223564  | 1    | 0    |
| m_19  | 35910  | MIR-361-5P: HSA-MIR-361-5P; MMU-MIR-361; RNO-MIR-361                                                  | 0.0227743                 | 0.20936437        | 1.221056398  | 1    | 0    |
| m_20  | 35914  | MIR-377: HSA-MIR-377; MMU-MIR-377; RNO-MIR-377                                                        | 0.0811218                 | 0.31253233        | 1.216463919  | 1    | 0    |
| m_21  | 35922  | MIR-425*: HSA-MIR-425*; HSA-MIR-425*                                                                  | 0.2405421                 | 0.356040759       | 0.556040759  | 1    | 0    |
| m_22  | 35925  | MIR-9*: MMU-MIR-9*; HSA-MIR-9*; RNO-MIR-9*                                                            | 0.3470732                 | 0.44107223        | 1.703389349  | 1    | 0    |
| m_23  | 38314  | LET-7A: HSA-LET-7A; MMU-LET-7A; RNO-LET-7A                                                            | 0.0099755                 | 0.20936437        | 2.259943742  | 1    | 0    |
| m_24  | 38315  | LET-7F: HSA-LET-7F; MMU-LET-7F; RNO-LET-7F                                                            | 0.0133634                 | 0.20936437        | 1.578072257  | 1    | 0    |
| m_25  | 38316  | MIR-100: HSA-MIR-100; MMU-MIR-100; RNO-MIR-100                                                        | 0.0555242                 | 0.27838153        | 1.245544862  | 1    | 0    |
| m_26  | 38321  | MIR-142-3P: HSA-MIR-142-3P; MMU-MIR-142-3P; RNO-MIR-142-3P                                            | 0.2732919                 | 0.40660505        | -0.770073055 | 0    | 1    |
| m_27  | 38322  | MIR-146B-5P: HSA-MIR-146B-5P; MMU-MIR-146B; RNO-MIR-146B                                              | 0.0133634                 | 0.20936437        | 1.610529112  | 1    | 0    |
| m_28  | 38325  | MIR-198B-5P: HSA-MIR-198B-5P; MMU-MIR-198B-5P; RNO-MIR-198B-5P                                        | 0.0675701                 | 0.29795977        | 1.751285151  | 1    | 0    |
| m_29  | 38327  | MIR-19B: HSA-MIR-19B; MMU-MIR-19B; RNO-MIR-19B                                                        | 0.0365142                 | 0.24298548        | 1.506461715  | 1    | 0    |
| m_30  | 38335  | MIR-219-5P: HSA-MIR-219-5P; MMU-MIR-219-5P; RNO-MIR-219-5P                                            | 0.3881046                 | 0.45674052        | -0.634035187 | 0    | 1    |
| m_31  | 38337  | MIR-221: HSA-MIR-221; MMU-MIR-221; RNO-MIR-221                                                        | 0.0675701                 | 0.29795977        | 3.147217506  | 1    | 0    |
| m_32  | 38343  | MIR-325-5P: HSA-MIR-325                                                                               | 0.1825711                 | 0.35355029        | -0.546802437 | 0    | 1    |
| m_33  | 38345  | MIR-330-3P: HSA-MIR-330-3P                                                                            | 0.0291737                 | 0.20936437        | -0.676200792 | 0    | 1    |
| m_34  | 38349  | MIR-365: HSA-MIR-365; MMU-MIR-365; RNO-MIR-365                                                        | 0.0555242                 | 0.27838153        | 1.345631158  | 1    | 0    |
| m_35  | 38351  | MIR-369-3P: HSA-MIR-369-3P; MMU-MIR-369-3P; RNO-MIR-369-3P                                            | 0.0969321                 | 0.3167601         | -0.796789519 | 0    | 1    |
| m_36  | 38365  | MIR-429: HSA-MIR-429                                                                                  | 0.3470732                 | 0.44107223        | 1.20016811   | 1    | 0    |
| m_37  | 38373  | MIR-485-3P: HSA-MIR-485-3P; MMU-MIR-485*; RNO-MIR-485*                                                | 0.1146245                 | 0.32521372        | -0.831594715 | 0    | 1    |
| m_38  | 38390  | MIR-517C: HSA-MIR-517C                                                                                | 0.2100508                 | 0.37319709        | 1.216104831  | 1    | 0    |
| m_39  | 38396  | MIR-524-5P: HSA-MIR-524-5P                                                                            | 0.3090533                 | 0.42049627        | -0.575801664 | 0    | 1    |
| m_40  | 38412  | MIR-562: HSA-MIR-562                                                                                  | 0.134952                  | 0.33830435        | 1.343073586  | 1    | 0    |
| m_41  | 38413  | MIR-563: HSA-MIR-563                                                                                  | 0.134952                  | 0.33830435        | 1.568134551  | 1    | 0    |
| m_42  | 38420  | MIR-572: HSA-MIR-572                                                                                  | 0.0227743                 | 0.20936437        | -0.888176812 | 0    | 1    |
| m_43  | 38427  | MIR-583: HSA-MIR-583                                                                                  | 0.134952                  | 0.33830435        | -1.076893445 | 0    | 1    |
| m_44  | 38443  | MIR-602: HSA-MIR-602                                                                                  | 0.0291737                 | 0.20936437        | -0.836221025 | 0    | 1    |
| m_45  | 38446  | MIR-605: HSA-MIR-605                                                                                  | 0.1146245                 | 0.32521372        | -0.598531834 | 0    | 1    |
| m_46  | 38468  | MIR-630: HSA-MIR-630                                                                                  | 0.2405421                 | 0.38783435        | -0.721426487 | 0    | 1    |
| m_47  | 38475  | MIR-638: HSA-MIR-638                                                                                  | 0.0099755                 | 0.20936437        | -1.077583316 | 0    | 1    |
| m_48  | 38479  | MIR-642A: HSA-MIR-642A                                                                                | 0.1146245                 | 0.32521372        | -1.121608947 | 0    | 1    |
| m_49  | 38489  | MIR-656: HSA-MIR-656                                                                                  | 0.3881046                 | 0.45674052        | -0.733259004 | 0    | 1    |
| m_50  | 38491  | MIR-658: HSA-MIR-658                                                                                  | 0.1573499                 | 0.342798          | -0.94260827  | 0    | 1    |
| m_51  | 38492  | MIR-659: HSA-MIR-659                                                                                  | 0.0365142                 | 0.24298548        | -1.596659699 | 0    | 1    |
| m_52  | 38493  | MIR-661: HSA-MIR-661                                                                                  | 0.3090533                 | 0.42049627        | -0.672613499 | 0    | 1    |
| m_53  | 38499  | MIR-106B: HSA-MIR-106B; MMU-MIR-106B; RNO-MIR-106B                                                    | 0.0227743                 | 0.20936437        | 1.374387113  | 1    | 0    |
| m_54  | 38501  | MIR-135A: HSA-MIR-135A; MMU-MIR-135A; RNO-MIR-135A                                                    | 0.9109731                 | 0.44107223        | -0.61442027  | 0    | 1    |
| m_55  | 38503  | MIR-199A-5P: HSA-MIR-199A-5P; MMU-MIR-199A-5P; RNO-MIR-199A-5P                                        | 0.0291737                 | 0.20936437        | 2.361398646  | 1    | 0    |
| m_56  | 38517  | MIR-296-5P: HSA-MIR-296-5P; MMU-MIR-296-5P; RNO-MIR-296*                                              | 0.5249388                 | 0.5601388         | -1.410379138 | 0    | 1    |
| m_57  | 38528  | MIR-379: HSA-MIR-379; MMU-MIR-379; RNO-MIR-379                                                        | 0.0227743                 | 0.20936437        | 1.446876012  | 1    | 0    |
| m_58  | 38543  | MIR-148B: HSA-MIR-148B; MMU-MIR-148B; RNO-MIR-148B-3P                                                 | 0.1146245                 | 0.32521372        | 1.350004104  | 1    | 0    |
| m_59  | 38555  | MIR-338-3P: RNO-MIR-338; MMU-MIR-338-3P; HSA-MIR-338-3P                                               | 0.0555242                 | 0.27838153        | 1.221504962  | 1    | 0    |
| m_60  | 38566  | MIR-497: HSA-MIR-497; MMU-MIR-497; RNO-MIR-497                                                        | 0.0227743                 | 0.20936437        | 2.468076256  | 1    | 0    |
| m_61  | 38569  | MIR-29B: HSA-MIR-29B; MMU-MIR-29B; RNO-MIR-29B                                                        | 0.0291737                 | 0.20936437        | 2.937171321  | 1    | 0    |
| m_62  | 38571  | MIR-328-3P: HSA-MIR-328; MMU-MIR-328; RNO-MIR-328A                                                    | 0.1573499                 | 0.342798          | -0.798686489 | 0    | 1    |
| m_63  | 38613  | MIR-550A: HSA-MIR-550A                                                                                | 0.0969321                 | 0.3167601         | -0.950888339 | 0    | 1    |
| m_64  | 38616  | MIR-556-5P: HSA-MIR-556-5P                                                                            | 0.6273292                 | 0.6413477         | -0.536668791 | 0    | 1    |
| m_65  | 38630  | MIR-624: HSA-MIR-624                                                                                  | 0.0969321                 | 0.3167601         | -1.206551178 | 0    | 1    |
| m_66  | 38631  | MIR-625: HSA-MIR-625                                                                                  | 0.6273292                 | 0.6413477         | -0.595109453 | 0    | 1    |
| m_67  | 38635  | MIR-636: HSA-MIR-636                                                                                  | 0.0969321                 | 0.3167601         | -0.51221104  | 0    | 1    |
| m_68  | 38641  | MIR-655: HSA-MIR-655                                                                                  | 0.3470732                 | 0.44107223        | 0.611472068  | 0    | 1    |
| m_69  | 38643  | MIR-663: HSA-MIR-663                                                                                  | 0.0050819                 | 0.20936437        | -1.339518478 | 0    | 1    |
| m_70  | 38654  | KSHV-MIR-K12-10A: KSHV-MIR-K12-10A                                                                    | 0.1573499                 | 0.342798          | -0.810043295 | 0    | 1    |
| m_71  | 38655  | KSHV-MIR-K12-10B: KSHV-MIR-K12-10B                                                                    | 0.3090533                 | 0.42049627        | -0.690195236 | 0    | 1    |
| m_72  | 38717  | MIR-183: HSA-MIR-183; MMU-MIR-183; RNO-MIR-183                                                        | 0.0453604                 | 0.26352255        | -1.263442073 | 0    | 1    |
| m_73  | 38866  | MIR-151-5P:151B: HSA-MIR-151-5P; MMU-MIR-151-5P; RNO-MIR-151: HSA-MIR-151B                            | 0.0099755                 | 0.20936437        | 1.690015675  | 1    | 0    |
| m_74  | 38873  | MIR-22*: RNO-MIR-22*: HSA-MIR-22*; MMU-MIR-22*                                                        | 0.1146245                 | 0.32521372        | 1.864098874  | 1    | 0    |
| m_75  | 38883  | MIR-301A: HSA-MIR-301A; MMU-MIR-301A; RNO-MIR-301A                                                    | 0.0291737                 | 0.20936437        | 1.260994605  | 1    | 0    |
| m_76  | 39096  | EBV-MIR-BART14-5P: EBV-MIR-BART14-5P                                                                  | 0.0365142                 | 0.24298548        | -0.62801174  | 0    | 1    |
| m_77  | 39104  | EBV-MIR-BART17-3P: EBV-MIR-BART17-3P                                                                  | 0.0811218                 | 0.31253233        | -1.002243603 | 0    | 1    |
| m_78  | 39111  | EBV-MIR-BART19-3P: EBV-MIR-BART19-3P                                                                  | 0.9109731                 | 0.91097307        | -0.936249145 | 0    | 1    |
| m_79  | 39123  | EBV-MIR-BART6-3P: EBV-MIR-BART6-3P                                                                    | 0.0227743                 | 0.20936437        | -0.843334524 | 0    | 1    |
| m_80  | 39128  | EBV-MIR-BART8-3P: EBV-MIR-BART8-3P                                                                    | 0.134952                  | 0.33830435        | -0.694928731 | 0    | 1    |
| m_81  | 39132  | EBV-MIR-BHRF1-1: EBV-MIR-BHRF1-1                                                                      | 0.0227743                 | 0.20936437        | -0.836378198 | 0    | 1    |
| m_82  | 39138  | HCMV-MIR-UL112: HCMV-MIR-UL112                                                                        | 0.3090533                 | 0.42049627        | -0.549040675 | 0    | 1    |
| m_83  | 39139  | HCMV-MIR-UL148D: HCMV-MIR-UL148D                                                                      | 0.0811218                 | 0.31253233        | -0.680659174 | 0    | 1    |
| m_84  | 39149  | HCMV-MIR-US33-5P: HCMV-MIR-US33-5P                                                                    | 0.1825711                 | 0.35355029        | -1.036001523 | 0    | 1    |
| m_85  | 39153  | LET-7D: HSA-LET-7D; MMU-LET-7D; RNO-LET-7D                                                            | 0.0969321                 | 0.3167601         | 1.226674804  | 1    | 0    |
| m_86  | 39155  | LET-7E: HSA-LET-7E; MMU-LET-7E; RNO-LET-7E                                                            | 0.0291737                 | 0.20936437        | 1.281646088  | 1    | 0    |
| m_87  | 39156  | LET-7G: HSA-LET-7G; MMU-LET-7G                                                                        | 0.0176925                 | 0.20936437        | 1.627573169  | 1    | 0    |
| m_88  | 39158  | MIR-1A: HSA-MIR-1A; MMU-MIR-1A                                                                        | 0.8518727                 | 0.85655336        | 1.94414037   | 1    | 0    |
| m_89  | 39163  | MIR-744: HSA-MIR-744; MMU-MIR-744; RNO-MIR-744                                                        | 0.0969321                 | 0.3167601         | -0.85985332  | 0    | 1    |
| m_90  | 39165  | MIR-615-3P: RNO-MIR-615-3P; HSA-MIR-615-3P; MMU-MIR-615-3P                                            | 0.1573499                 | 0.342798          | -1.677181924 | 0    | 1    |
| m_91  | 39166  | MIR-615-5P: HSA-MIR-615-5P; MMU-MIR-615-5P; RNO-MIR-615                                               | 0.1573499                 | 0.342798          | -0.897136223 | 0    | 1    |
| m_92  | 39175  | MIR-885-3P: HSA-MIR-885-3P                                                                            | 0.0555242                 | 0.27838153        | -0.793522451 | 0    | 1    |
| m_93  | 39185  | MIR-874: HSA-MIR-874; MMU-MIR-874; RNO-MIR-874                                                        | 0.3881046                 | 0.45674052        | -0.844128479 | 0    | 1    |
| m_94  | 39196  | MIR-665: HSA-MIR-665                                                                                  | 0.0133634                 | 0.20936437        | -1.077518251 | 0    | 1    |
| m_95  | 39199  | MIR-106A: HSA-MIR-106A                                                                                | 0.0811218                 | 0.31253233        | 1.402789394  | 1    | 0    |
| m_96  | 39210  | MIR-128: HSA-MIR-128; MMU-MIR-128; RNO-MIR-128                                                        | 0.0365142                 | 0.24298548        | 1.904723965  | 1    | 0    |
| m_97  | 39211  | MIR-133A: HSA-MIR-133A; MMU-MIR-133A; RNO-MIR-133A                                                    | 0.3090533                 | 0.42049627        | 4.802308539  | 1    | 0    |
| m_98  | 39212  | MIR-133B: HSA-MIR-133B; MMU-MIR-133B; RNO-MIR-133B                                                    | 0.1825711                 | 0.35355029        | 4.562390311  | 1    | 0    |
| m_99  | 39216  | MIR-138: HSA-MIR-138; MMU-MIR-138; RNO-MIR-138                                                        | 0.4771316                 | 0.52599445        | 1.732681807  | 1    | 0    |
| m_100 | 39237  | MIR-181B: HSA-MIR-181B; MMU-MIR-181B; RNO-MIR-181B                                                    | 0.0071523                 | 0.20936437        | 2.87116484   | 1    | 0    |
| m_101 | 39243  | MIR-185: HSA-MIR-185; MMU-MIR-185; RNO-MIR-185                                                        | 0.0675701                 | 0.29795977        | -0.459278848 | 0    | 1    |
| m_102 | 39249  | MIR-18A*: HSA-MIR-18A*; MMU-MIR-18A*; RNO-MIR-18A*                                                    | 0.3881046                 | 0.45674052        | -0.694048555 | 0    | 1    |
| m_103 | 39254  | MIR-191*: HSA-MIR-191*                                                                                | 0.0675701                 | 0.29795977        | -0.537511958 | 0    | 1    |
| m_104 | 39256  | MIR-193A-3P: HSA-MIR-193A-3P; MMU-MIR-193; RNO-MIR-193                                                | 0.7368718                 | 0.74501407        | -0.552269157 | 0    | 1    |
| m_105 | 39260  | MIR-196A: HSA-MIR-196A; MMU-MIR-196A; RNO-MIR-196A                                                    | 0.0050819                 | 0.20936437        | 1.723288209  | 1    | 0    |
| m_106 | 39264  | MIR-198: HSA-MIR-198                                                                                  | 0.1573499                 | 0.342798          | -0.61885019  | 0    | 1    |
| m_107 | 39265  | MIR-199A-3P-199B-3P: HSA-MIR-199A-3P; HSA-MIR-199B-3P; MMU-MIR-199A-3P; MMU-MIR-199B; RNO-MIR-199A-3P | 0.0176925                 | 0.20936437        | 2.607320218  | 1    | 0    |
| m_108 | 39268  | MIR-891A: HSA-MIR-891A                                                                                | 0.2405421                 | 0.38783435        | -0.655580805 | 0    | 1    |
| m_109 | 39270  | MIR-892B: HSA-MIR-892B                                                                                | 0.1825711                 | 0.35355029        | -1.03        |      |      |

|       |       |                                                         |            |            |               |   |   |
|-------|-------|---------------------------------------------------------|------------|------------|---------------|---|---|
| m_213 | 40147 | MIR-146B-3P; HSA-MIR-146B-3P                            | 0.134952   | 0.33830435 | -1.067240734  | 0 | 1 |
| m_214 | 40148 | MIR-93B; HSA-MIR-93B                                    | 0.0969321  | 0.3167601  | -1.844452169  | 0 | 1 |
| m_215 | 40157 | MIR-939; HSA-MIR-939                                    | 0.1573499  | 0.342798   | -0.709645997  | 0 | 1 |
| m_216 | 40160 | MIR-23B*; HSA-MIR-23B*; MMU-MIR-23B*; RNO-MIR-23B*      | 0.2732919  | 0.40660505 | -0.738348225  | 0 | 1 |
| m_217 | 40163 | MIR-877*; MMU-MIR-877*; HSA-MIR-877*                    | 0.0811218  | 0.31253233 | -1.118528227  | 0 | 1 |
| m_218 | 40164 | MIR-934; HSA-MIR-934                                    | 0.3090533  | 0.42049627 | -0.601753078  | 0 | 1 |
| m_219 | 40165 | MIR-593; HSA-MIR-593                                    | 0.2405421  | 0.38783435 | -0.780644626  | 0 | 1 |
| m_220 | 40166 | MIR-933; HSA-MIR-933                                    | 0.1573499  | 0.342798   | -1.135396139  | 0 | 1 |
| m_221 | 40167 | MIR-130A*; HSA-MIR-130A*; RNO-MIR-130A*                 | 0.3470732  | 0.44107223 | -0.792223193  | 0 | 1 |
| m_222 | 40169 | MIR-450B-3P; HSA-MIR-450B-3P                            | 0.2732919  | 0.40660505 | -0.67837119   | 0 | 1 |
| m_223 | 40171 | HCMV-MIR-UL36*; HCMV-MIR-UL36*                          | 0.3881046  | 0.45674052 | -0.749767056  | 0 | 1 |
| m_224 | 40172 | MIR-335*; HSA-MIR-335*; MMU-MIR-335-3P                  | 0.1825711  | 0.35355029 | -1.022487466  | 0 | 1 |
| m_225 | 40194 | MIR-486-3P; HSA-MIR-486-3P; MMU-MIR-3107*               | 0.1825711  | 0.35355029 | -0.874269683  | 0 | 1 |
| m_226 | 40195 | MIR-625*; HSA-MIR-625*                                  | 0.0675701  | 0.29795977 | -1.571166517  | 0 | 1 |
| m_227 | 40200 | MIR-328-5P; MMU-MIR-328*; HSA-MIR-328-5P; RNO-MIR-328A* | 0.2405421  | 0.38783435 | -0.685588859  | 0 | 1 |
| m_228 | 40214 | MIR-1224-3P; HSA-MIR-1224-3P                            | 0.1825711  | 0.35355029 | -0.870152504  | 0 | 1 |
| m_229 | 40215 | MIR-1224-5P; HSA-MIR-1224-5P                            | 0.2732919  | 0.40660505 | -0.729046626  | 0 | 1 |
| m_230 | 40216 | MIR-1225-3P; HSA-MIR-1225-3P                            | 0.0675701  | 0.29795977 | -1.070154931  | 0 | 1 |
| m_231 | 40217 | MIR-1225-5P; HSA-MIR-1225-5P                            | 0.3090533  | 0.42049627 | -1.234142885  | 0 | 1 |
| m_232 | 40218 | MIR-1226; HSA-MIR-1226                                  | 0.1825711  | 0.35355029 | -0.809912142  | 0 | 1 |
| m_233 | 40219 | MIR-1228*; HSA-MIR-1228*                                | 0.2732919  | 0.40660505 | -0.528439957  | 0 | 1 |
| m_234 | 40221 | MIR-1228; HSA-MIR-1228                                  | 0.0811218  | 0.31253233 | -0.86675396   | 0 | 1 |
| m_235 | 40222 | MIR-1229*; HSA-MIR-1229*                                | 0.0227743  | 0.20936437 | -1.25250658   | 0 | 1 |
| m_236 | 40223 | MIR-1229; HSA-MIR-1229                                  | 0.134952   | 0.33830435 | -1.027328834  | 0 | 1 |
| m_237 | 40225 | MIR-1233; HSA-MIR-1233                                  | 0.134952   | 0.33830435 | -0.756917594  | 0 | 1 |
| m_238 | 40226 | MIR-1234; HSA-MIR-1234                                  | 0.1146245  | 0.32521372 | -0.65169462   | 0 | 1 |
| m_239 | 40227 | MIR-1236; HSA-MIR-1236                                  | 0.0675701  | 0.29795977 | -0.975755663  | 0 | 1 |
| m_240 | 40228 | MIR-1237; HSA-MIR-1237                                  | 0.1146245  | 0.32521372 | -1.01159558   | 0 | 1 |
| m_241 | 40231 | MIR-913C; HSA-MIR-913C                                  | 0.8518727  | 0.37319709 | -0.706753536  | 0 | 1 |
| m_242 | 40285 | HIV1-MIR-TAR-3P; HIV1-MIR-TAR-3P                        | 0.0811218  | 0.31253233 | -2.284008748  | 0 | 1 |
| m_243 | 40286 | HIV1-MIR-TAR-5P; HIV1-MIR-TAR-5P                        | 0.2100508  | 0.37319709 | -0.799725     | 0 | 1 |
| m_244 | 40289 | MIR-1180; HSA-MIR-1180                                  | 0.2732919  | 0.40660505 | -0.638587605  | 0 | 1 |
| m_245 | 40290 | MIR-1181; HSA-MIR-1181                                  | 0.134952   | 0.33830435 | -0.876054174  | 0 | 1 |
| m_246 | 40291 | MIR-1182; HSA-MIR-1182                                  | 0.3470732  | 0.44107223 | -0.849646133  | 0 | 1 |
| m_247 | 40292 | MIR-1183; HSA-MIR-1183                                  | 0.4312065  | 0.48560482 | -0.835804648  | 0 | 1 |
| m_248 | 40293 | MIR-1184; HSA-MIR-1184                                  | 0.1825711  | 0.35355029 | -0.890935506  | 0 | 1 |
| m_249 | 40294 | MIR-1185; HSA-MIR-1185                                  | 0.134952   | 0.33830435 | -1.015419214  | 0 | 1 |
| m_250 | 40305 | MIR-1197; HSA-MIR-1197; MMU-MIR-1197                    | 0.134952   | 0.33830435 | -0.763695657  | 0 | 1 |
| m_251 | 40308 | MIR-1200; HSA-MIR-1200                                  | 0.1825711  | 0.35355029 | -0.975200287  | 0 | 1 |
| m_252 | 40310 | MIR-1202; HSA-MIR-1202                                  | 0.0675701  | 0.29795977 | -1.935084668  | 0 | 1 |
| m_253 | 40311 | MIR-1203; HSA-MIR-1203                                  | 0.3881046  | 0.45674052 | -0.890992535  | 0 | 1 |
| m_254 | 40312 | MIR-1204; HSA-MIR-1204                                  | 0.1146245  | 0.32521372 | -1.19944221   | 0 | 1 |
| m_255 | 40313 | MIR-1205; HSA-MIR-1205                                  | 0.2100508  | 0.37319709 | -0.840352594  | 0 | 1 |
| m_256 | 40314 | MIR-1206; HSA-MIR-1206                                  | 0.2732919  | 0.40660505 | -0.526492654  | 0 | 1 |
| m_257 | 40315 | MIR-1207-3P; HSA-MIR-1207-3P                            | 0.3090533  | 0.42049627 | -0.66827805   | 0 | 1 |
| m_258 | 40316 | MIR-1207-5P; HSA-MIR-1207-5P                            | 0.0675701  | 0.29795977 | -1.006156146  | 0 | 1 |
| m_259 | 40317 | MIR-1208; HSA-MIR-1208                                  | 0.2405421  | 0.38783435 | -0.661825224  | 0 | 1 |
| m_260 | 40318 | MIR-1243; HSA-MIR-1243                                  | 0.3470732  | 0.44107223 | -0.678155647  | 0 | 1 |
| m_261 | 40320 | MIR-1245; HSA-MIR-1245                                  | 0.2405421  | 0.38783435 | -0.73680602   | 0 | 1 |
| m_262 | 40322 | MIR-1247; HSA-MIR-1247                                  | 0.1825711  | 0.35355029 | -0.782645504  | 0 | 1 |
| m_263 | 40323 | MIR-1248; HSA-MIR-1248                                  | 0.0291737  | 0.20936437 | -2.026344903  | 1 | 0 |
| m_264 | 40324 | MIR-1249; HSA-MIR-1249                                  | 0.0555242  | 0.27838153 | -1.22502147   | 0 | 1 |
| m_265 | 40325 | MIR-1250; HSA-MIR-1250                                  | 0.3470732  | 0.44107223 | -0.671572391  | 0 | 1 |
| m_266 | 40327 | MIR-1252; HSA-MIR-1252                                  | 0.4771316  | 0.52599445 | -0.531078645  | 0 | 1 |
| m_267 | 40328 | MIR-1253; HSA-MIR-1253                                  | 0.3470732  | 0.44107223 | -1.260496087  | 0 | 1 |
| m_268 | 40329 | MIR-1254; HSA-MIR-1254                                  | 0.1825711  | 0.35355029 | -0.942248827  | 0 | 1 |
| m_269 | 40332 | MIR-1256; HSA-MIR-1256                                  | 0.2732919  | 0.40660505 | -0.939604043  | 0 | 1 |
| m_270 | 40333 | MIR-1257; HSA-MIR-1257                                  | 0.2732919  | 0.40660505 | -0.707858026  | 0 | 1 |
| m_271 | 40334 | MIR-1258; HSA-MIR-1258                                  | 0.0969321  | 0.3167601  | -1.162053675  | 0 | 1 |
| m_272 | 40341 | MIR-1265; HSA-MIR-1265                                  | 0.3470732  | 0.44107223 | -0.54866861   | 0 | 1 |
| m_273 | 40343 | MIR-1267; HSA-MIR-1267                                  | 0.0675701  | 0.29795977 | -1.241243213  | 0 | 1 |
| m_274 | 40344 | MIR-1268-1268B; HSA-MIR-1268; HSA-MIR-1268B             | 0.0811218  | 0.31253233 | -0.97581086   | 0 | 1 |
| m_275 | 40346 | MIR-1270; HSA-MIR-1270                                  | 0.3090533  | 0.42049627 | -0.640819412  | 0 | 1 |
| m_276 | 40348 | MIR-1272; HSA-MIR-1272                                  | 0.2405421  | 0.38783435 | -0.538751543  | 0 | 1 |
| m_277 | 40349 | MIR-1273; HSA-MIR-1273                                  | 0.1825711  | 0.35355029 | -0.804193867  | 0 | 1 |
| m_278 | 40352 | MIR-1275; HSA-MIR-1275                                  | 0.0291737  | 0.20936437 | -1.668322453  | 0 | 1 |
| m_279 | 40353 | MIR-1276; HSA-MIR-1276                                  | 0.5249388  | 0.5601388  | -0.532490422  | 0 | 1 |
| m_280 | 40354 | MIR-1277; HSA-MIR-1277                                  | 0.3090533  | 0.42049627 | -0.715158934  | 0 | 1 |
| m_281 | 40355 | MIR-1278; HSA-MIR-1278                                  | 0.1146245  | 0.32521372 | -0.75134855   | 0 | 1 |
| m_282 | 40356 | MIR-1279; HSA-MIR-1279                                  | 0.4312065  | 0.48560482 | -0.6691414    | 0 | 1 |
| m_283 | 40358 | MIR-1281; HSA-MIR-1281                                  | 0.0555242  | 0.27838153 | -1.094332671  | 0 | 1 |
| m_284 | 40359 | MIR-1282; HSA-MIR-1282                                  | 0.0969321  | 0.3167601  | -0.855602402  | 0 | 1 |
| m_285 | 40360 | MIR-1283; HSA-MIR-1283                                  | 0.2405421  | 0.38783435 | -0.596900989  | 0 | 1 |
| m_286 | 40361 | MIR-1284; HSA-MIR-1284                                  | 0.2100508  | 0.37319709 | -1.242613373  | 0 | 1 |
| m_287 | 40362 | MIR-1285; HSA-MIR-1285                                  | 0.2100508  | 0.37319709 | -0.626898125  | 0 | 1 |
| m_288 | 40363 | MIR-1286; HSA-MIR-1286                                  | 0.0291737  | 0.20936437 | -1.495022244  | 0 | 1 |
| m_289 | 40365 | MIR-1288; HSA-MIR-1288                                  | 0.2100508  | 0.37319709 | -0.719815813  | 0 | 1 |
| m_290 | 40366 | MIR-1289; HSA-MIR-1289                                  | 0.2405421  | 0.38783435 | -0.574656546  | 0 | 1 |
| m_291 | 40368 | MIR-1291; HSA-MIR-1291                                  | 0.6273292  | 0.6413477  | -0.60798053   | 0 | 1 |
| m_292 | 40369 | MIR-1292; HSA-MIR-1292                                  | 0.2100508  | 0.37319709 | -0.682532082  | 0 | 1 |
| m_293 | 40370 | MIR-1293; HSA-MIR-1293                                  | 0.1573499  | 0.342798   | -1.110484566  | 0 | 1 |
| m_294 | 40371 | MIR-1294; HSA-MIR-1294                                  | 0.2100508  | 0.37319709 | -0.663874332  | 0 | 1 |
| m_295 | 40372 | MIR-1295; HSA-MIR-1295                                  | 0.4312065  | 0.48560482 | -0.591338452  | 0 | 1 |
| m_296 | 40373 | MIR-1296; HSA-MIR-1296                                  | 0.0969321  | 0.3167601  | -1.29527135   | 0 | 1 |
| m_297 | 40376 | MIR-1299; HSA-MIR-1299                                  | 0.1825711  | 0.35355029 | -0.852126594  | 0 | 1 |
| m_298 | 40379 | MIR-1301; HSA-MIR-1301                                  | 0.3881046  | 0.45674052 | -1.228081046  | 0 | 1 |
| m_299 | 40381 | MIR-1303; HSA-MIR-1303                                  | 0.0176925  | 0.20936437 | -1.319485649  | 0 | 1 |
| m_300 | 40382 | MIR-1304; HSA-MIR-1304                                  | 0.1573499  | 0.342798   | -0.739576579  | 0 | 1 |
| m_301 | 40383 | MIR-1305; HSA-MIR-1305                                  | 0.0969321  | 0.3167601  | -1.131821081  | 0 | 1 |
| m_302 | 40385 | MIR-1307; HSA-MIR-1307                                  | 0.3881046  | 0.45674052 | -0.711869306  | 0 | 1 |
| m_303 | 40387 | MIR-1321; HSA-MIR-1321                                  | 0.3881046  | 0.45674052 | -0.605792634  | 0 | 1 |
| m_304 | 40389 | MIR-1323; HSA-MIR-1323                                  | 0.1573499  | 0.342798   | -1.205033003  | 0 | 1 |
| m_305 | 40390 | MIR-1324; HSA-MIR-1324                                  | 0.3881046  | 0.45674052 | -0.576769037  | 0 | 1 |
| m_306 | 40391 | MIR-1825; HSA-MIR-1825                                  | 0.0969321  | 0.3167601  | -1.155483632  | 0 | 1 |
| m_307 | 40393 | MIR-1827; HSA-MIR-1827                                  | 0.3881046  | 0.45674052 | -0.565669993  | 0 | 1 |
| m_308 | 40395 | MIR-302F; HSA-MIR-302F                                  | 0.3881046  | 0.45674052 | -0.561444136  | 0 | 1 |
| m_309 | 40398 | MIR-320D; HSA-MIR-320D                                  | 0.0099755  | 0.20936437 | -1.298152239  | 1 | 0 |
| m_310 | 40405 | MIR-548F; MIR-548G; HSA-MIR-548F; HSA-MIR-548G          | 0.4312065  | 0.48560482 | -0.668635523  | 0 | 1 |
| m_311 | 40412 | MIR-548N; HSA-MIR-548N                                  | 0.2405421  | 0.38783435 | -0.601294457  | 0 | 1 |
| m_312 | 40413 | MIR-548O; HSA-MIR-548O                                  | 0.3090533  | 0.42049627 | -0.565124978  | 0 | 1 |
| m_313 | 40414 | MIR-548P-548AM; HSA-MIR-548P; HSA-MIR-548AM             | 0.3470732  | 0.44107223 | -0.639475662  | 0 | 1 |
| m_314 | 40416 | MIR-664-3P; HSA-MIR-664                                 | 0.2405421  | 0.38783435 | -0.646083034  | 0 | 1 |
| m_315 | 40427 | MIR-103B; HSA-MIR-103B                                  | 0.3470732  | 0.44107223 | -0.5307613881 | 0 | 1 |
| m_316 | 40429 | MIR-146B; HSA-MIR-146B                                  | 0.1573499  | 0.342798   | -0.848669786  | 0 | 1 |
| m_317 | 40430 | MIR-1470; HSA-MIR-1470                                  | 0.0811218  | 0.31253233 | -0.927090389  | 0 | 1 |
| m_318 | 40431 | MIR-1471; HSA-MIR-1471                                  | 0.1146245  | 0.32521372 | -2.385371601  | 0 | 1 |
| m_319 | 40433 | MIR-1538; HSA-MIR-1538                                  | 0.2732919  | 0.40660505 | -0.677709287  | 0 | 1 |
| m_320 | 40434 | MIR-1539; HSA-MIR-1539                                  | 0.3470732  | 0.44107223 | -0.701775593  | 0 | 1 |
| m_321 | 40435 | MIR-1908; HSA-MIR-1908                                  | 0.0133938  | 0.20936437 | -1.712608661  | 0 | 1 |
| m_322 | 40436 | MIR-1909*; HSA-MIR-1909*                                | 0.0969321  | 0.3167601  | -0.697974826  | 0 | 1 |
| m_323 | 40437 | MIR-1909; HSA-MIR-1909                                  | 0.5753812  | 0.60340832 | -0.940424887  | 0 | 1 |
| m_324 | 40438 | MIR-1910; HSA-MIR-1910                                  | 0.2732919  | 0.40660505 | -0.754550044  | 0 | 1 |
| m_325 | 40440 | MIR-1911*; HSA-MIR-1911*                                | 0.4312065  | 0.48560482 | -0.544863646  | 0 | 1 |
| m_326 | 40442 | MIR-1913; HSA-MIR-1913                                  | 0.1146245  | 0.32521372 | -1.240608251  | 0 | 1 |
| m_327 | 40443 | MIR-1914; HSA-MIR-1914                                  | 0.2100508  | 0.37319709 | -0.837384089  | 0 | 1 |
| m_328 | 40444 | MIR-1914*; HSA-MIR-1914*                                | 0.134952   | 0.33830435 | -1.708591822  | 0 | 1 |
| m_329 | 40445 | MIR-1915*; HSA-MIR-1915*                                | 0.04833684 | 0.20936437 | -1.263475159  | 0 | 1 |
| m_330 | 40446 | MIR-1915; HSA-MIR-1915                                  | 0.0099755  | 0.20936437 | -1.609043615  | 1 | 0 |
| m_331 | 40447 | MIR-675*; HSA-MIR-675*                                  | 0.2732919  | 0.40660505 | -0.601867056  | 0 | 1 |
| m_332 | 40466 | HSV1-MIR-H2*; HSV1-MIR-H2*                              | 0.3881046  | 0.45674052 | -0.695118702  | 0 | 1 |
| m_333 | 40467 | HSV1-MIR-H2; HSV1-MIR-H2                                | 0.3470732  | 0.44107223 | -0.76288025   | 0 | 1 |
| m_334 |       |                                                         |            |            |               |   |   |

|       |                                                                                   |               |   |   |
|-------|-----------------------------------------------------------------------------------|---------------|---|---|
| 38352 | MIR-369-5P; HSA-MIR-369-5P; MMU-MIR-369-5P; RNO-MIR-369-5P                        | 0.439060672   | 0 | 0 |
| 38353 | MIR-372: HSA-MIR-372                                                              | 0.070953313   | 0 | 0 |
| 38354 | MIR-373: HSA-MIR-373                                                              | 0.129164867   | 0 | 0 |
| 38355 | MIR-374A: HSA-MIR-374A                                                            | -0.227095057  | 0 | 0 |
| 38356 | MIR-376A: HSA-MIR-376A                                                            | -0.11834215   | 0 | 0 |
| 38357 | MIR-376B: HSA-MIR-376B                                                            | -0.079352086  | 0 | 0 |
| 38358 | MIR-380-3P: HSA-MIR-380-3P                                                        | -0.042099393  | 0 | 0 |
| 38359 | MIR-383: HSA-MIR-383                                                              | 0.157648348   | 0 | 0 |
| 38361 | MIR-411: HSA-MIR-411; MMU-MIR-411; RNO-MIR-411                                    | 0.733501425   | 0 | 0 |
| 38362 | MIR-421-3P; RNO-MIR-421*; HSA-MIR-421; MMU-MIR-421                                | 0.310676961   | 0 | 0 |
| 38363 | MIR-322-MIR-424: HSA-MIR-424; (HSA-MIR-322)                                       | 0.149009382   | 0 | 0 |
| 38364 | MIR-425: HSA-MIR-425; MMU-MIR-425; RNO-MIR-425                                    | 0.22197208    | 0 | 0 |
| 38367 | MIR-432: HSA-MIR-432                                                              | 0.481607568   | 0 | 0 |
| 38368 | MIR-448: HSA-MIR-448; MMU-MIR-448-3P; RNO-MIR-448                                 | -0.150187003  | 0 | 0 |
| 38369 | MIR-449A: HSA-MIR-449A; MMU-MIR-449A; RNO-MIR-449A                                | 0.030674863   | 0 | 0 |
| 38370 | MIR-449B: HSA-MIR-449B                                                            | 0.346427038   | 0 | 0 |
| 38371 | MIR-455-5P; HSA-MIR-455-5P; MMU-MIR-455*; RNO-MIR-455                             | 0.254240525   | 0 | 0 |
| 38372 | MIR-484: HSA-MIR-484; MMU-MIR-484; RNO-MIR-484                                    | -0.378392765  | 0 | 0 |
| 38374 | MIR-485-5P; HSA-MIR-485-5P; MMU-MIR-485; RNO-MIR-485                              | -0.053552693  | 0 | 0 |
| 38375 | MIR-486-5P; HSA-MIR-486-5P; MMU-MIR-486                                           | -0.426727867  | 0 | 0 |
| 38376 | MIR-487A: HSA-MIR-487A                                                            | 0.225166161   | 0 | 0 |
| 38377 | MIR-487B: HSA-MIR-487B; MMU-MIR-487B; RNO-MIR-487B                                | 0.847231467   | 0 | 0 |
| 38378 | MIR-492: HSA-MIR-492                                                              | -0.156986478  | 0 | 0 |
| 38380 | MIR-498: HSA-MIR-498                                                              | -0.282746002  | 0 | 0 |
| 38381 | MIR-500A*: HSA-MIR-500A*                                                          | 0.254385309   | 0 | 0 |
| 38383 | MIR-503: HSA-MIR-503                                                              | 0.276838969   | 0 | 0 |
| 38384 | MIR-506: HSA-MIR-506                                                              | 0.285646785   | 0 | 0 |
| 38385 | MIR-507: HSA-MIR-507                                                              | -0.236703714  | 0 | 0 |
| 38386 | MIR-508-3P: HSA-MIR-508-3P                                                        | 0.029846107   | 0 | 0 |
| 38387 | MIR-511: HSA-MIR-511                                                              | 0.94166256    | 0 | 0 |
| 38388 | MIR-512-3P: HSA-MIR-512-3P                                                        | 0.046680621   | 0 | 0 |
| 38389 | MIR-515-5P: HSA-MIR-515-5P                                                        | 1.083697038   | 0 | 0 |
| 38391 | MIR-518B: HSA-MIR-518B                                                            | -0.224844072  | 0 | 0 |
| 38392 | MIR-520A-3P: HSA-MIR-520A-3P                                                      | -0.234357154  | 0 | 0 |
| 38393 | MIR-520A-5P: HSA-MIR-520A-5P                                                      | -0.058698077  | 0 | 0 |
| 38394 | MIR-520G: HSA-MIR-520G                                                            | -0.138959798  | 0 | 0 |
| 38395 | MIR-521: HSA-MIR-521                                                              | 0.438609142   | 0 | 0 |
| 38397 | MIR-525-5P: HSA-MIR-525-5P                                                        | -0.295465856  | 0 | 0 |
| 38398 | MIR-539-5P: HSA-MIR-539; MMU-MIR-539-5P; RNO-MIR-539                              | 0.302498535   | 0 | 0 |
| 38399 | MIR-548A-3P: HSA-MIR-548A-3P                                                      | -0.055858469  | 0 | 0 |
| 38400 | MIR-548B-3P: HSA-MIR-548B-3P                                                      | 0.436563206   | 0 | 0 |
| 38401 | MIR-548D-3P: HSA-MIR-548D-3P                                                      | -0.016785683  | 0 | 0 |
| 38402 | MIR-549: HSA-MIR-549                                                              | -0.27981934   | 0 | 0 |
| 38403 | MIR-551A: HSA-MIR-551A                                                            | 0.013420707   | 0 | 0 |
| 38404 | MIR-552: HSA-MIR-552                                                              | -0.144394312  | 0 | 0 |
| 38405 | MIR-553: HSA-MIR-553                                                              | -0.399123484  | 0 | 0 |
| 38406 | MIR-554: HSA-MIR-554                                                              | -0.167815262  | 0 | 0 |
| 38407 | MIR-555: HSA-MIR-555                                                              | 0.371809947   | 0 | 0 |
| 38408 | MIR-557: HSA-MIR-557                                                              | 0.20266196    | 0 | 0 |
| 38409 | MIR-558: HSA-MIR-558                                                              | 0.812952257   | 0 | 0 |
| 38410 | MIR-559: HSA-MIR-559                                                              | -0.1122404    | 0 | 0 |
| 38411 | MIR-561: HSA-MIR-561                                                              | -0.261242091  | 0 | 0 |
| 38414 | MIR-564: HSA-MIR-564                                                              | 0.17992656    | 0 | 0 |
| 38415 | MIR-566: HSA-MIR-566                                                              | 0.061289568   | 0 | 0 |
| 38416 | MIR-567: HSA-MIR-567                                                              | 0.249683892   | 0 | 0 |
| 38417 | MIR-568: HSA-MIR-568; MMU-MIR-568; RNO-MIR-568                                    | -0.1468832453 | 0 | 0 |
| 38418 | MIR-569: HSA-MIR-569                                                              | 0.367413265   | 0 | 0 |
| 38419 | MIR-571: HSA-MIR-571                                                              | -0.052418524  | 0 | 0 |
| 38421 | MIR-573: HSA-MIR-573                                                              | 0.233769982   | 0 | 0 |
| 38422 | MIR-575: HSA-MIR-575                                                              | -0.253226292  | 0 | 0 |
| 38423 | MIR-577: HSA-MIR-577                                                              | -0.228126112  | 0 | 0 |
| 38424 | MIR-578: HSA-MIR-578                                                              | 0.426318363   | 0 | 0 |
| 38425 | MIR-580: HSA-MIR-580                                                              | 0.219736944   | 0 | 0 |
| 38426 | MIR-581: HSA-MIR-581                                                              | -0.103352656  | 0 | 0 |
| 38428 | MIR-584: HSA-MIR-584                                                              | -0.463118558  | 0 | 0 |
| 38429 | MIR-585: HSA-MIR-585                                                              | 0.661260791   | 0 | 0 |
| 38430 | MIR-586: HSA-MIR-586                                                              | -0.257202326  | 0 | 0 |
| 38431 | MIR-587: HSA-MIR-587                                                              | 0.439415353   | 0 | 0 |
| 38432 | MIR-588: HSA-MIR-588                                                              | 0.377675234   | 0 | 0 |
| 38433 | MIR-589*: HSA-MIR-589*                                                            | -0.456424886  | 0 | 0 |
| 38434 | MIR-591: HSA-MIR-591                                                              | 0.644299627   | 0 | 0 |
| 38436 | MIR-593*: HSA-MIR-593*                                                            | 0.988524254   | 0 | 0 |
| 38437 | MIR-595: HSA-MIR-595                                                              | -0.418218244  | 0 | 0 |
| 38438 | MIR-596: HSA-MIR-596                                                              | -0.011400689  | 0 | 0 |
| 38439 | MIR-597: HSA-MIR-597                                                              | 0.291703118   | 0 | 0 |
| 38440 | MIR-598-3P: HSA-MIR-598                                                           | 0.713261923   | 0 | 0 |
| 38441 | MIR-600: HSA-MIR-600                                                              | 0.240957514   | 0 | 0 |
| 38442 | MIR-601: HSA-MIR-601                                                              | -0.404167839  | 0 | 0 |
| 38444 | MIR-603: HSA-MIR-603                                                              | 0.138909936   | 0 | 0 |
| 38445 | MIR-604: HSA-MIR-604                                                              | -0.154487037  | 0 | 0 |
| 38447 | MIR-606: HSA-MIR-606                                                              | 0.016491705   | 0 | 0 |
| 38448 | MIR-607: HSA-MIR-607                                                              | -0.0227702897 | 0 | 0 |
| 38449 | MIR-608: HSA-MIR-608                                                              | -0.478169523  | 0 | 0 |
| 38450 | MIR-609: HSA-MIR-609                                                              | 0.2353179541  | 0 | 0 |
| 38451 | MIR-610: HSA-MIR-610                                                              | -0.004756558  | 0 | 0 |
| 38452 | MIR-611: HSA-MIR-611                                                              | -0.086169807  | 0 | 0 |
| 38453 | MIR-612: HSA-MIR-612                                                              | 0.373284918   | 0 | 0 |
| 38454 | MIR-613: HSA-MIR-613                                                              | 0.000602836   | 0 | 0 |
| 38455 | MIR-614: HSA-MIR-614                                                              | 0.011807345   | 0 | 0 |
| 38456 | MIR-616*: HSA-MIR-616*                                                            | 0.155456928   | 0 | 0 |
| 38457 | MIR-617: HSA-MIR-617                                                              | 0.364187555   | 0 | 0 |
| 38458 | MIR-618: HSA-MIR-618                                                              | -0.112247644  | 0 | 0 |
| 38459 | MIR-619: HSA-MIR-619                                                              | 0.335256553   | 0 | 0 |
| 38460 | MIR-620: HSA-MIR-620                                                              | 0.159767738   | 0 | 0 |
| 38461 | MIR-621: HSA-MIR-621                                                              | 0.039375755   | 0 | 0 |
| 38462 | MIR-622: HSA-MIR-622                                                              | 0.031947304   | 0 | 0 |
| 38463 | MIR-623: HSA-MIR-623                                                              | -0.211171363  | 0 | 0 |
| 38464 | MIR-624*: HSA-MIR-624*                                                            | 0.068458184   | 0 | 0 |
| 38465 | MIR-626: HSA-MIR-626                                                              | 0.046544184   | 0 | 0 |
| 38466 | MIR-627: HSA-MIR-627                                                              | 0.588312807   | 0 | 0 |
| 38467 | MIR-629*: HSA-MIR-629*                                                            | -0.02942615   | 0 | 0 |
| 38469 | MIR-631: HSA-MIR-631                                                              | -0.453528506  | 0 | 0 |
| 38470 | MIR-632: HSA-MIR-632                                                              | 0.228966234   | 0 | 0 |
| 38471 | MIR-633: HSA-MIR-633                                                              | -0.203905751  | 0 | 0 |
| 38472 | MIR-634: HSA-MIR-634                                                              | -0.281713539  | 0 | 0 |
| 38473 | MIR-635: HSA-MIR-635                                                              | 0.385800522   | 0 | 0 |
| 38474 | MIR-637: HSA-MIR-637                                                              | -0.033954192  | 0 | 0 |
| 38476 | MIR-639: HSA-MIR-639                                                              | 0.404053588   | 0 | 0 |
| 38477 | MIR-640: HSA-MIR-640                                                              | -0.24942949   | 0 | 0 |
| 38478 | MIR-641: HSA-MIR-641                                                              | 0.204994706   | 0 | 0 |
| 38480 | MIR-643: HSA-MIR-643                                                              | -0.00488522   | 0 | 0 |
| 38481 | MIR-644: HSA-MIR-644                                                              | 0.538150507   | 0 | 0 |
| 38482 | MIR-645: HSA-MIR-645                                                              | 0.290116968   | 0 | 0 |
| 38483 | MIR-646: HSA-MIR-646                                                              | 0.314236878   | 0 | 0 |
| 38484 | MIR-647: HSA-MIR-647                                                              | -0.022885045  | 0 | 0 |
| 38485 | MIR-648: HSA-MIR-648                                                              | 0.5039324895  | 0 | 0 |
| 38486 | MIR-649: HSA-MIR-649                                                              | 0.37543619    | 0 | 0 |
| 38487 | MIR-650: HSA-MIR-650                                                              | 0.014715122   | 0 | 0 |
| 38488 | MIR-651: HSA-MIR-651                                                              | -0.178980043  | 0 | 0 |
| 38490 | MIR-657: HSA-MIR-657                                                              | 0.482677122   | 0 | 0 |
| 38494 | MIR-662: HSA-MIR-662                                                              | 0.467592538   | 0 | 0 |
| 38495 | MIR-9: HSA-MIR-9; MMU-MIR-9; RNO-MIR-9                                            | 0.984712939   | 0 | 0 |
| 38496 | MIR-95: HSA-MIR-95                                                                | 0.845632731   | 0 | 0 |
| 38497 | MIR-98: HSA-MIR-98; MMU-MIR-98; RNO-MIR-98                                        | 0.720142616   | 0 | 0 |
| 38498 | MIR-99A: HSA-MIR-99A; MMU-MIR-99A; RNO-MIR-99A                                    | 1.1072824     | 0 | 0 |
| 38500 | MIR-132: HSA-MIR-132; MMU-MIR-132; RNO-MIR-132                                    | 0.956885835   | 0 | 0 |
| 38502 | MIR-184: HSA-MIR-184; MMU-MIR-184; RNO-MIR-184                                    | -0.044279962  | 0 | 0 |
| 38505 | MIR-200A: HSA-MIR-200A; MMU-MIR-200A; RNO-MIR-200A                                | 0.210755154   | 0 | 0 |
| 38507 | MIR-205: HSA-MIR-205; MMU-MIR-205; RNO-MIR-205                                    | -0.31327563   | 0 | 0 |
| 38508 | MIR-206: HSA-MIR-206; MMU-MIR-206; RNO-MIR-206                                    | 0.674617326   | 0 | 0 |
| 38519 | MIR-299-5P: HSA-MIR-299-5P; MMU-MIR-299*; RNO-MIR-299                             | 0.599793876   | 0 | 0 |
| 38521 | MIR-302A: HSA-MIR-302A; MMU-MIR-302A                                              | 0.343921304   | 0 | 0 |
| 38523 | MIR-31: HSA-MIR-31; MMU-MIR-31; RNO-MIR-31                                        | 0.569345793   | 0 | 0 |
| 38524 | MIR-326: HSA-MIR-326; MMU-MIR-326; RNO-MIR-326                                    | -0.360433876  | 0 | 0 |
| 38526 | MIR-34C-5P: HSA-MIR-34C-5P; MMU-MIR-34C; RNO-MIR-34C                              | 0.477836749   | 0 | 0 |
| 38531 | MIR-433-3P; MMU-MIR-433 (MMU-MIR-433-3P); HSA-MIR-433; RNO-MIR-433                | -0.393545961  | 0 | 0 |
| 38541 | MIR-542-3P: HSA-MIR-542-3P; MMU-MIR-542-3P; RNO-MIR-542-3P                        | 1.0791338     | 0 | 0 |
| 38542 | MIR-99B: HSA-MIR-99B; MMU-MIR-99B; RNO-MIR-99B                                    | 1.063789503   | 0 | 0 |
| 38546 | MIR-324-5P: HSA-MIR-324-5P; MMU-MIR-324-5P; RNO-MIR-324-5P                        | 0.744600109   | 0 | 0 |
| 38551 | MIR-331-3P: HSA-MIR-331-3P; MMU-MIR-331-3P; RNO-MIR-331                           | 1.185733296   | 0 | 0 |
| 38553 | MIR-335: HSA-MIR-335; MMU-MIR-335-5P; RNO-MIR-335                                 | 0.607224921   | 0 | 0 |
| 38562 | MIR-374B-374C: HSA-MIR-374B; MMU-MIR-374; RNO-MIR-374; HSA-MIR-374C; MMU-MIR-374C | -0.166879064  | 0 | 0 |
| 38564 | MIR-421-5P: HSA-MIR-421-5P; MMU-MIR-421*; RNO-MIR-421                             | -0.277962279  | 0 | 0 |
| 38567 | MIR-499-5P: HSA-MIR-499-5P; MMU-MIR-499; RNO-MIR-499                              | 0.2481079328  | 0 | 0 |
| 38570 | MIR-190: HSA-MIR-190; MMU-MIR-190; RNO-MIR-190                                    | -0.384876402  | 0 | 0 |
| 38607 | MIR-544: HSA-MIR-544                                                              | -0.442688487  | 0 | 0 |
| 38609 | MIR-545: HSA-MIR-545                                                              | 0.309159526   | 0 | 0 |
| 38610 | MIR-548C-3P: HSA-MIR-548C-3P                                                      | -0.015259057  | 0 | 0 |
| 38611 | MIR-548C-5P: HSA-MIR-548C-5P                                                      | 1.120467609   | 0 | 0 |
| 38612 | MIR-550A*: HSA-MIR-550A*                                                          | 0.34242364    | 0 | 0 |
| 38614 | MIR-551B: HSA-MIR-551B; MMU-MIR-551B; RNO-MIR-551B                                | 0.1616035     | 0 | 0 |
| 38621 | MIR-576-5P: HSA-MIR-576-5P                                                        | -0.30871163   | 0 | 0 |
| 38622 | MIR-576-3P: HSA-MIR-576-3P                                                        | 0.095761038   | 0 | 0 |
| 38624 | MIR-579: HSA-MIR-579                                                              | 0.099431114   | 0 | 0 |
| 38625 | MIR-582-5P: HSA-MIR-582-5P; MMU-MIR-582-5P; RNO-MIR-582                           | 0.899091162   | 0 | 0 |
| 38626 | MIR-590-5P: HSA-MIR-590-5P; MMU-MIR-590-5P                                        | 0.661132693   | 0 | 0 |
| 38628 | MIR-599: HSA-MIR-599; MMU-MIR-599                                                 | -0.482518651  | 0 | 0 |
| 38633 | MIR-629-3P: HSA-MIR-629-3P                                                        | 0.0029532944  | 0 | 0 |
| 38634 | MIR-629: HSA-MIR-629                                                              | 0.242732652   | 0 | 0 |
| 38637 | MIR-652: HSA-MIR-652; MMU-MIR-652; RNO-MIR-652                                    | 0.041096392   | 0 | 0 |
| 38639 | MIR-653: HSA-MIR-653; MMU-MIR-653                                                 | -0.053571277  | 0 | 0 |
| 38640 | MIR-654-5P: HSA-MIR-654-5P                                                        | 0.039934051   | 0 | 0 |
| 38642 | MIR-660: HSA-MIR-660                                                              | 1.121447486   | 0 | 0 |
| 38644 | MIR-7: HSA-MIR-7; MMU-MIR-7A; RNO-MIR-7A                                          | 0.517469983   | 0 | 0 |
| 38645 | MIR-92A: HSA-MIR-92A; MMU-MIR-92A; RNO-MIR-92A                                    | 1.112723716   | 0 | 0 |
| 38648 | MIR-92B: HSA-MIR-92B; MMU-MIR-92B; RNO-MIR-92B                                    | 0.725495724   | 0 | 0 |
| 38652 | KSHV-MIR-K12-12*: KSHV-MIR-K12-12*                                                | -0.078177748  | 0 | 0 |
| 38653 | KSHV-MIR-K12-1: KSHV-MIR-K12-1                                                    | 0.218045811   | 0 | 0 |
| 38656 | KSHV-MIR-K12-11: KSHV-MIR-K12-11                                                  | 0.2680042     | 0 | 0 |
| 38657 | KSHV-MIR-K12-2: KSHV-MIR-K12-2                                                    | -0.448849036  | 0 | 0 |
| 38659 | KSHV-MIR-K12-3*: KSHV-MIR-K12-3*                                                  | 0.615847414   | 0 | 0 |
| 38660 | KSHV-MIR-K12-3: KSHV-MIR-K12-3                                                    | -0.470321883  | 0 | 0 |
| 38661 | KSHV-MIR-K12-4-3P: KSHV-MIR-K12-4-3P                                              | -0.294890895  | 0 | 0 |
| 38662 | KSHV-MIR-K12-4-5P: KSHV-MIR-K12-4-5P                                              | 0.21558967    | 0 | 0 |
| 38663 | KSHV-MIR-K12-5: KSHV-MIR-K12-5                                                    | -0.334455714  | 0 | 0 |
| 38664 | KSHV-MIR-K12-6-3P: KSHV-MIR-K12-6-3P                                              | 0.355661146   | 0 | 0 |
| 38665 | KSHV-MIR-K12-6-5P: KSHV-MIR-K12-6-5P                                              | 0.345890269   | 0 | 0 |
| 38666 | KSHV-MIR-K12-7: KSHV-MIR-K12-7                                                    | 0.04038672    | 0 | 0 |
| 38667 | KSHV-MIR-K12-8: KSHV-MIR-K12-8                                                    | -0.290683962  | 0 | 0 |
| 38668 | KSHV-MIR-K12-9: KSHV-MIR-K12-9                                                    | 0.469023248   | 0 | 0 |
| 38679 | LET-7D*: MMU-LET-7D*; RNO-LET-7D*; HSA-LET-7D*                                    | -0.496070326  | 0 | 0 |
| 38719 | MIR-186: HSA-MIR-186; MMU-MIR-186; RNO-MIR-186                                    | -0.482833838  | 0 | 0 |
| 38723 | MIR-200B: HSA-MIR-200B; MMU-MIR-200B; RNO-MIR-200B                                | 0.346         |   |   |

|       |                                                                                                                                          |              |   |   |
|-------|------------------------------------------------------------------------------------------------------------------------------------------|--------------|---|---|
| 39113 | EBV-MIR-BART20-3P; EBV-MIR-BART20-3P                                                                                                     | 0.267975979  | 0 | 0 |
| 39116 | EBV-MIR-BART2-3P; EBV-MIR-BART2-3P                                                                                                       | 0.249751896  | 0 | 0 |
| 39117 | EBV-MIR-BART2-5P; EBV-MIR-BART2-5P                                                                                                       | 0.147427729  | 0 | 0 |
| 39118 | EBV-MIR-BART3-3P; EBV-MIR-BART3-3P                                                                                                       | 0.206067252  | 0 | 0 |
| 39119 | EBV-MIR-BART3-5P; EBV-MIR-BART3-5P                                                                                                       | 0.200781193  | 0 | 0 |
| 39121 | EBV-MIR-BART4; EBV-MIR-BART4                                                                                                             | -0.035350241 | 0 | 0 |
| 39122 | EBV-MIR-BART5; EBV-MIR-BART5                                                                                                             | 0.280731136  | 0 | 0 |
| 39125 | EBV-MIR-BART6-5P; EBV-MIR-BART6-5P                                                                                                       | 0.031946044  | 0 | 0 |
| 39126 | EBV-MIR-BART7; EBV-MIR-BART7                                                                                                             | 0.24378045   | 0 | 0 |
| 39129 | EBV-MIR-BART8-5P; EBV-MIR-BART8-5P                                                                                                       | 0.448260111  | 0 | 0 |
| 39131 | EBV-MIR-BART9; EBV-MIR-BART9                                                                                                             | -0.458478805 | 0 | 0 |
| 39133 | EBV-MIR-BHRF1-2; EBV-MIR-BHRF1-2                                                                                                         | 0.686552448  | 0 | 0 |
| 39134 | EBV-MIR-BHRF1-2*; EBV-MIR-BHRF1-2*                                                                                                       | 0.813797832  | 0 | 0 |
| 39136 | EBV-MIR-BHRF1-3; EBV-MIR-BHRF1-3                                                                                                         | 0.249004564  | 0 | 0 |
| 39140 | HCMV-MIR-UL22A; HCMV-MIR-UL22A                                                                                                           | 0.112370738  | 0 | 0 |
| 39141 | HCMV-MIR-UL22A*; HCMV-MIR-UL22A*                                                                                                         | 0.849409202  | 0 | 0 |
| 39142 | HCMV-MIR-UL36; HCMV-MIR-UL36                                                                                                             | -0.384444768 | 0 | 0 |
| 39143 | HCMV-MIR-UL70-3P; HCMV-MIR-UL70-3P                                                                                                       | -0.125435564 | 0 | 0 |
| 39144 | HCMV-MIR-UL70-5P; HCMV-MIR-UL70-5P                                                                                                       | 0.207196387  | 0 | 0 |
| 39145 | HCMV-MIR-US25-1; HCMV-MIR-US25-1                                                                                                         | -0.162301861 | 0 | 0 |
| 39146 | HCMV-MIR-US25-2-3P; HCMV-MIR-US25-2-3P                                                                                                   | -0.204571302 | 0 | 0 |
| 39147 | HCMV-MIR-US25-2-5P; HCMV-MIR-US25-2-5P                                                                                                   | -0.198344747 | 0 | 0 |
| 39148 | HCMV-MIR-US33-3P; HCMV-MIR-US33-3P                                                                                                       | 0.207790268  | 0 | 0 |
| 39150 | HCMV-MIR-US4; HCMV-MIR-US4                                                                                                               | -0.41538976  | 0 | 0 |
| 39151 | HCMV-MIR-US5-1; HCMV-MIR-US5-1                                                                                                           | 0.343418787  | 0 | 0 |
| 39152 | HCMV-MIR-US5-2; HCMV-MIR-US5-2                                                                                                           | 0.343824673  | 0 | 0 |
| 39157 | LET-7f; HSA-LET-7f; MMU-LET-7f; RNO-LET-7f                                                                                               | 0.72629785   | 0 | 0 |
| 39160 | MIR-888*; HSA-MIR-888*                                                                                                                   | 0.407001719  | 0 | 0 |
| 39161 | MIR-888; HSA-MIR-888                                                                                                                     | 1.069728907  | 0 | 0 |
| 39164 | MIR-532-3P; HSA-MIR-532-3P; MMU-MIR-532-3P; RNO-MIR-532-3P                                                                               | 0.115946771  | 0 | 0 |
| 39168 | MIR-770-3P; HSA-MIR-770-3P                                                                                                               | 0.060865851  | 0 | 0 |
| 39169 | MIR-770-5P; HSA-MIR-770-5P                                                                                                               | -0.13457411  | 0 | 0 |
| 39170 | MIR-190B; HSA-MIR-190B; MMU-MIR-190B                                                                                                     | 0.106374258  | 0 | 0 |
| 39172 | MIR-873; HSA-MIR-873; MMU-MIR-873; RNO-MIR-873                                                                                           | 0.655062835  | 0 | 0 |
| 39176 | MIR-885-5P; HSA-MIR-885-5P                                                                                                               | -0.331182088 | 0 | 0 |
| 39177 | MIR-590-3P; HSA-MIR-590-3P; MMU-MIR-590-3P                                                                                               | -0.179834511 | 0 | 0 |
| 39178 | MIR-671-3P; HSA-MIR-671-3P; MMU-MIR-671-3P; RNO-MIR-671                                                                                  | 0.474832588  | 0 | 0 |
| 39180 | MIR-570; HSA-MIR-570                                                                                                                     | 1.085494363  | 0 | 0 |
| 39181 | MIR-708*; HSA-MIR-708*; RNO-MIR-708*; MMU-MIR-708*                                                                                       | 0.5751645    | 0 | 0 |
| 39182 | MIR-708; HSA-MIR-708; MMU-MIR-708; RNO-MIR-708                                                                                           | 0.667730259  | 0 | 0 |
| 39184 | MIR-887; HSA-MIR-887                                                                                                                     | -0.00283647  | 0 | 0 |
| 39186 | MIR-574-3P; MMU-MIR-574-3P; HSA-MIR-574-3P                                                                                               | 0.121311832  | 0 | 0 |
| 39187 | MIR-574-5P; HSA-MIR-574-5P; MMU-MIR-574-5P                                                                                               | -0.155096574 | 0 | 0 |
| 39188 | MIR-654-3P; HSA-MIR-654-3P; MMU-MIR-654-3P                                                                                               | 0.915282535  | 0 | 0 |
| 39191 | MIR-875-3P; HSA-MIR-875-3P                                                                                                               | 0.53025701   | 0 | 0 |
| 39192 | MIR-875-5P; HSA-MIR-875-5P; MMU-MIR-875-5P; RNO-MIR-875                                                                                  | -0.088732538 | 0 | 0 |
| 39193 | MIR-876-3P; HSA-MIR-876-3P                                                                                                               | 0.458964147  | 0 | 0 |
| 39194 | MIR-876-5P; HSA-MIR-876-5P                                                                                                               | -0.092655936 | 0 | 0 |
| 39198 | MIR-105; HSA-MIR-105                                                                                                                     | 0.485995263  | 0 | 0 |
| 39202 | MIR-10B; HSA-MIR-10B; MMU-MIR-10B; RNO-MIR-10B                                                                                           | 1.06963746   | 0 | 0 |
| 39203 | MIR-758; HSA-MIR-758; MMU-MIR-758; RNO-MIR-758                                                                                           | 0.647028329  | 0 | 0 |
| 39204 | MIR-208B; HSA-MIR-208B; MMU-MIR-208B; RNO-MIR-208B                                                                                       | -0.424343269 | 0 | 0 |
| 39205 | MIR-889; HSA-MIR-889                                                                                                                     | -0.40747465  | 0 | 0 |
| 39207 | MIR-124; HSA-MIR-124; MMU-MIR-124; RNO-MIR-124                                                                                           | 0.409335678  | 0 | 0 |
| 39208 | MIR-125A-5P; HSA-MIR-125A-5P; MMU-MIR-125A-5P; RNO-MIR-125A-5P                                                                           | 1.055225311  | 0 | 0 |
| 39209 | MIR-126-3P; HSA-MIR-126; MMU-MIR-126-3P; RNO-MIR-126                                                                                     | -0.262538128 | 0 | 0 |
| 39214 | MIR-135B; HSA-MIR-135B; MMU-MIR-135B; RNO-MIR-135B                                                                                       | -0.239933693 | 0 | 0 |
| 39217 | MIR-139-5P; HSA-MIR-139-5P; MMU-MIR-139-5P; RNO-MIR-139-5P                                                                               | 0.211119411  | 0 | 0 |
| 39219 | MIR-142-5P; HSA-MIR-142-5P; MMU-MIR-142-5P; RNO-MIR-142-5P                                                                               | 0.001637308  | 0 | 0 |
| 39224 | MIR-147A; HSA-MIR-147A (HSA-MIR-147)                                                                                                     | 0.424778863  | 0 | 0 |
| 39225 | MIR-147B; HSA-MIR-147B; MMU-MIR-147; RNO-MIR-147                                                                                         | 0.817253992  | 0 | 0 |
| 39226 | MIR-149; HSA-MIR-149; MMU-MIR-149; RNO-MIR-149-5P                                                                                        | -0.142379697 | 0 | 0 |
| 39227 | MIR-151-3P; HSA-MIR-151-3P                                                                                                               | 0.814640332  | 0 | 0 |
| 39232 | MIR-154*; HSA-MIR-154*; MMU-MIR-154*                                                                                                     | 0.775056235  | 0 | 0 |
| 39234 | MIR-155; HSA-MIR-155                                                                                                                     | -0.050791614 | 0 | 0 |
| 39235 | MIR-17*; HSA-MIR-17*; RNO-MIR-17-1-3P                                                                                                    | 0.192040841  | 0 | 0 |
| 39238 | MIR-181D; HSA-MIR-181D; MMU-MIR-181D; RNO-MIR-181D                                                                                       | 1.194998578  | 0 | 0 |
| 39240 | MIR-182*; HSA-MIR-182*; MMU-MIR-182*                                                                                                     | 0.711436137  | 0 | 0 |
| 39246 | MIR-188-3P; HSA-MIR-188-3P; MMU-MIR-188-3P; RNO-MIR-188*                                                                                 | 0.188522467  | 0 | 0 |
| 39247 | MIR-188-5P; HSA-MIR-188-5P; MMU-MIR-188-5P; RNO-MIR-188                                                                                  | 0.419523471  | 0 | 0 |
| 39248 | MIR-24-1*; HSA-MIR-24-1*; MMU-MIR-24-1*; RNO-MIR-24-1*                                                                                   | 0.648055066  | 0 | 0 |
| 39251 | MIR-18A; HSA-MIR-18A; MMU-MIR-18A; RNO-MIR-18A                                                                                           | 1.013419326  | 0 | 0 |
| 39253 | MIR-18B; HSA-MIR-18B                                                                                                                     | 0.667855424  | 0 | 0 |
| 39255 | MIR-191; HSA-MIR-191; MMU-MIR-191; RNO-MIR-191                                                                                           | 0.424573958  | 0 | 0 |
| 39257 | MIR-193B; HSA-MIR-193B                                                                                                                   | 0.237663164  | 0 | 0 |
| 39262 | MIR-196B; HSA-MIR-196B; MMU-MIR-196B; RNO-MIR-196B                                                                                       | 0.554672947  | 0 | 0 |
| 39267 | MIR-890; HSA-MIR-890                                                                                                                     | -0.209049247 | 0 | 0 |
| 39268 | MIR-891B; HSA-MIR-891B                                                                                                                   | 0.570528451  | 0 | 0 |
| 39269 | MIR-877; HSA-MIR-877; MMU-MIR-877; RNO-MIR-877                                                                                           | -0.458314596 | 0 | 0 |
| 39271 | MIR-200A*; HSA-MIR-200A*; MMU-MIR-200A*; RNO-MIR-200A*                                                                                   | 0.107224207  | 0 | 0 |
| 39273 | MIR-200C; HSA-MIR-200C; MMU-MIR-200C; RNO-MIR-200C                                                                                       | 0.182347279  | 0 | 0 |
| 39274 | MIR-202-3P; HSA-MIR-202                                                                                                                  | -0.162699265 | 0 | 0 |
| 39275 | MIR-202-5P; HSA-MIR-202; MMU-MIR-202-5P; RNO-MIR-202                                                                                     | -0.004835788 | 0 | 0 |
| 39282 | MIR-216A; HSA-MIR-216A; MMU-MIR-216A; RNO-MIR-216A                                                                                       | 0.233464646  | 0 | 0 |
| 39283 | MIR-216B; HSA-MIR-216B; MMU-MIR-216B; RNO-MIR-216B                                                                                       | 0.058160032  | 0 | 0 |
| 39284 | MIR-217; HSA-MIR-217                                                                                                                     | 0.040760896  | 0 | 0 |
| 39292 | MIR-224; HSA-MIR-224; RNO-MIR-224                                                                                                        | 0.715922907  | 0 | 0 |
| 39296 | MIR-28-3P; HSA-MIR-28-3P; RNO-MIR-28*                                                                                                    | 0.184340447  | 0 | 0 |
| 39300 | MIR-29C; HSA-MIR-29C; MMU-MIR-29C; RNO-MIR-29C                                                                                           | 0.334415807  | 0 | 0 |
| 39301 | MIR-300-3P; HSA-MIR-300                                                                                                                  | 0.124737999  | 0 | 0 |
| 39302 | MIR-301B; HSA-MIR-301B                                                                                                                   | 0.519336418  | 0 | 0 |
| 39303 | MIR-302A*; HSA-MIR-302A*                                                                                                                 | 0.790111186  | 0 | 0 |
| 39304 | MIR-302B*; HSA-MIR-302B*                                                                                                                 | 0.996421488  | 0 | 0 |
| 39306 | MIR-30A*; HSA-MIR-30A*; MMU-MIR-30A*; RNO-MIR-30A*                                                                                       | -0.059669081 | 0 | 0 |
| 39308 | MIR-30E*; HSA-MIR-30E*; MMU-MIR-30E*; RNO-MIR-30E*                                                                                       | 0.958334535  | 0 | 0 |
| 39312 | MIR-320A; HSA-MIR-320A; MMU-MIR-320; RNO-MIR-320                                                                                         | 0.966657798  | 0 | 0 |
| 39315 | MIR-323-5P; HSA-MIR-323-5P; MMU-MIR-323-5P; RNO-MIR-323*                                                                                 | 0.37795514   | 0 | 0 |
| 39317 | MIR-325-3P; HSA-MIR-325-3P                                                                                                               | -0.322895165 | 0 | 0 |
| 39320 | MIR-330-5P; HSA-MIR-330-5P; MMU-MIR-330; RNO-MIR-330-5P                                                                                  | 0.002989846  | 0 | 0 |
| 39321 | MIR-331-5P; HSA-MIR-331-5P; MMU-MIR-331-5P; RNO-MIR-331-5P                                                                               | -0.065878564 | 0 | 0 |
| 39323 | MIR-337-3P; HSA-MIR-337-3P; (RNO-MIR-337); (MMU-MIR-337-3P)                                                                              | 0.168232533  | 0 | 0 |
| 39324 | MIR-337-5P; HSA-MIR-337-5P                                                                                                               | 0.90962703   | 0 | 0 |
| 39326 | MIR-339-3P; HSA-MIR-339-3P                                                                                                               | 0.370711665  | 0 | 0 |
| 39327 | MIR-339-5P; HSA-MIR-339-5P; MMU-MIR-339-5P; RNO-MIR-339-5P                                                                               | 0.820387971  | 0 | 0 |
| 39328 | MIR-33A; MMU-MIR-33; RNO-MIR-33; HSA-MIR-33A                                                                                             | -0.261918761 | 0 | 0 |
| 39329 | MIR-33B; HSA-MIR-33B                                                                                                                     | -0.474212697 | 0 | 0 |
| 39331 | MIR-340-5P; HSA-MIR-340; MMU-MIR-340-5P; RNO-MIR-340-5P                                                                                  | -0.373533042 | 0 | 0 |
| 39334 | MIR-345-5P; HSA-MIR-345                                                                                                                  | 0.206712662  | 0 | 0 |
| 39338 | MIR-34B-5P; HSA-MIR-34B*                                                                                                                 | 0.625119342  | 0 | 0 |
| 39339 | MIR-362-3P; HSA-MIR-362-3P                                                                                                               | 1.168088371  | 0 | 0 |
| 39340 | MIR-582-3P; HSA-MIR-582-3P                                                                                                               | 0.093210837  | 0 | 0 |
| 39345 | MIR-371-3P; HSA-MIR-371-3P                                                                                                               | -0.296945049 | 0 | 0 |
| 39351 | MIR-380-5P; HSA-MIR-380*; MMU-MIR-380-5P; RNO-MIR-380                                                                                    | 0.467660449  | 0 | 0 |
| 39358 | MIR-409-5P; HSA-MIR-409-5P; MMU-MIR-409-5P; RNO-MIR-409-5P                                                                               | 0.086384091  | 0 | 0 |
| 39361 | MIR-422A; HSA-MIR-422A                                                                                                                   | 0.305373861  | 0 | 0 |
| 39364 | MIR-423-3P; HSA-MIR-423-3P; MMU-MIR-423-3P; RNO-MIR-423                                                                                  | 0.460242894  | 0 | 0 |
| 39365 | MIR-423-5P; HSA-MIR-423-5P; MMU-MIR-423-5P; RNO-MIR-423*                                                                                 | -0.380439751 | 0 | 0 |
| 39366 | MIR-432*; HSA-MIR-432*                                                                                                                   | 0.054782412  | 0 | 0 |
| 39368 | MIR-450A-5P; HSA-MIR-450A; MMU-MIR-450A; RNO-MIR-450A-2                                                                                  | -0.39928519  | 0 | 0 |
| 39370 | MIR-451; HSA-MIR-451; MMU-MIR-451; RNO-MIR-451                                                                                           | -0.185991479 | 0 | 0 |
| 39373 | MIR-452; HSA-MIR-452; MMU-MIR-452-5P                                                                                                     | 0.045041351  | 0 | 0 |
| 39375 | MIR-323B-5P; HSA-MIR-323B-5P                                                                                                             | 0.35384356   | 0 | 0 |
| 39378 | MIR-802; MMU-MIR-802; HSA-MIR-802; RNO-MIR-802                                                                                           | -0.074587722 | 0 | 0 |
| 39379 | MIR-892A; HSA-MIR-892A                                                                                                                   | 0.263061335  | 0 | 0 |
| 39383 | MIR-488*; HSA-MIR-488*                                                                                                                   | 0.187648339  | 0 | 0 |
| 39384 | MIR-488; HSA-MIR-488                                                                                                                     | 0.904704605  | 0 | 0 |
| 39385 | MIR-489; HSA-MIR-489                                                                                                                     | 0.325170065  | 0 | 0 |
| 39387 | MIR-490-3P; HSA-MIR-490-3P; MMU-MIR-490; RNO-MIR-490                                                                                     | 0.379026371  | 0 | 0 |
| 39388 | MIR-490-5P; HSA-MIR-490-5P; MMU-MIR-490-5P; RNO-MIR-490-5P                                                                               | 1.193590321  | 0 | 0 |
| 39390 | MIR-491-3P; HSA-MIR-491-3P; MMU-MIR-491-3P                                                                                               | 0.500685902  | 0 | 0 |
| 39392 | MIR-493; RNO-MIR-493; HSA-MIR-493                                                                                                        | 0.363493683  | 0 | 0 |
| 39394 | MIR-494; HSA-MIR-494; MMU-MIR-494; RNO-MIR-494                                                                                           | -0.183070493 | 0 | 0 |
| 39396 | MIR-495; HSA-MIR-495; MMU-MIR-495; RNO-MIR-495                                                                                           | 0.138000749  | 0 | 0 |
| 39400 | MIR-501-3P; HSA-MIR-501-3P                                                                                                               | 0.239959184  | 0 | 0 |
| 39401 | MIR-502-5P; HSA-MIR-502-5P                                                                                                               | -0.054138681 | 0 | 0 |
| 39402 | MIR-502-3P; HSA-MIR-502-3P                                                                                                               | 0.459213133  | 0 | 0 |
| 39404 | MIR-504; HSA-MIR-504; MMU-MIR-504                                                                                                        | 0.067326354  | 0 | 0 |
| 39406 | MIR-505; HSA-MIR-505; RNO-MIR-505                                                                                                        | 0.75256081   | 0 | 0 |
| 39408 | MIR-509-3P; HSA-MIR-509-3P                                                                                                               | -0.140697968 | 0 | 0 |
| 39409 | MIR-509-5P; HSA-MIR-509-5P                                                                                                               | -0.012252119 | 0 | 0 |
| 39410 | MIR-509-3-5P; HSA-MIR-509-3-5P                                                                                                           | 0.228309648  | 0 | 0 |
| 39412 | MIR-510; HSA-MIR-510                                                                                                                     | 0.09792804   | 0 | 0 |
| 39414 | MIR-512-5P; HSA-MIR-512-5P                                                                                                               | 0.112846686  | 0 | 0 |
| 39415 | MIR-513A-5P; HSA-MIR-513A-5P                                                                                                             | -0.356615599 | 0 | 0 |
| 39416 | MIR-513A-3P; HSA-MIR-513A-3P                                                                                                             | -0.049749047 | 0 | 0 |
| 39419 | MIR-514; HSA-MIR-514                                                                                                                     | 0.80599165   | 0 | 0 |
| 39421 | MIR-515-3P; HSA-MIR-515-3P                                                                                                               | 0.072682208  | 0 | 0 |
| 39422 | MIR-516A-3P-MIR-516*; HSA-MIR-516A-3P; HSA-MIR-516B*                                                                                     | 0.09084079   | 0 | 0 |
| 39423 | MIR-516B; HSA-MIR-516B                                                                                                                   | -0.195280183 | 0 | 0 |
| 39424 | MIR-516A-5P; HSA-MIR-516A-5P                                                                                                             | -0.210910845 | 0 | 0 |
| 39426 | MIR-517*; HSA-MIR-517*                                                                                                                   | 0.153961476  | 0 | 0 |
| 39427 | MIR-517A-MIR-517B_1; HSA-MIR-517A; HSA-MIR-517B                                                                                          | 0.062376911  | 0 | 0 |
| 39433 | MIR-518A-3P; HSA-MIR-518A-3P                                                                                                             | 0.054493092  | 0 | 0 |
| 39436 | MIR-518C; HSA-MIR-518C                                                                                                                   | -0.456591813 | 0 | 0 |
| 39438 | MIR-518D-5P-520C-5P-526A; HSA-MIR-518D-5P; HSA-MIR-520C-5P; HSA-MIR-526A                                                                 | -0.290042618 | 0 | 0 |
| 39439 | MIR-518D-3P; HSA-MIR-518D-3P                                                                                                             | 0.754209907  | 0 | 0 |
| 39440 | MIR-519E; HSA-MIR-519E                                                                                                                   | 0.741012493  | 0 | 0 |
| 39441 | MIR-518E*; HSA-MIR-518A* 1-519B-5P-519C-5P-522* 523*-526C; HSA-MIR-518E*; HSA-MIR-519A*; HSA-MIR-519B-5P; HSA-MIR-519C-5P; HSA-MIR-522*; | 0.219854887  | 0 | 0 |
| 39444 | MIR-518F*; HSA-MIR-518F*                                                                                                                 | 0.115135998  | 0 | 0 |
| 39446 | MIR-519A; HSA-MIR-519A                                                                                                                   | 1.051034103  | 0 | 0 |
| 39448 | MIR-519B-3P; HSA-MIR-519B-3P                                                                                                             | 0.677201196  | 0 | 0 |
| 39450 | MIR-519C-3P; HSA-MIR-519C-3P                                                                                                             | -0.160395819 | 0 | 0 |
| 39451 | MIR-519D; HSA-MIR-519D                                                                                                                   | 0.204899033  | 0 | 0 |
| 39455 | MIR-519E; HSA-MIR-519E                                                                                                                   | 0.664874744  | 0 | 0 |
| 39456 | MIR-520C-3P-520F-520B_4; HSA-MIR-520C-3P; HSA-MIR-520F; HSA-MIR-520B                                                                     | 0.405160171  | 0 | 0 |
| 39460 | MIR-520D-3P; HSA-MIR-520D-3P                                                                                                             | -0.019366724 | 0 | 0 |
| 39464 | MIR-520E; HSA-MIR-520E                                                                                                                   | 0.846603741  | 0 | 0 |
| 39467 | MIR-520H; HSA-MIR-520H                                                                                                                   | 0.628406475  | 0 | 0 |
| 39468 | MIR-522; HSA-MIR-522                                                                                                                     | 1.109725962  | 0 | 0 |
| 39471 | MIR-523; HSA-MIR-523                                                                                                                     | -0.33        |   |   |

|       |                                                               |               |   |   |
|-------|---------------------------------------------------------------|---------------|---|---|
| 39977 | MIR-20B*: HSA-MIR-20B*                                        | -0.059921892  | 0 | 0 |
| 39978 | MIR-367*: HSA-MIR-367*                                        | -0.046528129  | 0 | 0 |
| 39980 | MIR-302D*: HSA-MIR-302D*; MMU-MIR-302D*                       | -0.470139521  | 0 | 0 |
| 39983 | MIR-377*: HSA-MIR-377*                                        | -0.211305423  | 0 | 0 |
| 39984 | MIR-924: HSA-MIR-924                                          | -0.291198828  | 0 | 0 |
| 39991 | MIR-27A*: HSA-MIR-27A*; MMU-MIR-27A*; RNO-MIR-27A*            | -0.127245553  | 0 | 0 |
| 39996 | MIR-92A-1*: HSA-MIR-92A-1*                                    | -0.288896679  | 0 | 0 |
| 39997 | MIR-616: HSA-MIR-616                                          | -0.074556714  | 0 | 0 |
| 39999 | MIR-19B-1*: HSA-MIR-19B-1*; RNO-MIR-19B-1*                    | -0.148904663  | 0 | 0 |
| 40000 | MIR-19B-2*: HSA-MIR-19B-2*                                    | -0.056065063  | 0 | 0 |
| 40001 | MIR-19A*: HSA-MIR-19A*; MMU-MIR-19A*                          | -0.075058648  | 0 | 0 |
| 40004 | MIR-556-3P: HSA-MIR-556-3P                                    | -0.408725856  | 0 | 0 |
| 40009 | MIR-135B*: HSA-MIR-135B*                                      | 0.340420776   | 0 | 0 |
| 40013 | MIR-497*: HSA-MIR-497*; MMU-MIR-497*; RNO-MIR-497*            | -0.305387965  | 0 | 0 |
| 40014 | MIR-10A*: HSA-MIR-10A*; MMU-MIR-10A*; RNO-MIR-10A-3P          | 0.031387999   | 0 | 0 |
| 40015 | MIR-7-2*: HSA-MIR-7-2*                                        | -0.40036471   | 0 | 0 |
| 40016 | MIR-21*: HSA-MIR-21*                                          | 0.277586647   | 0 | 0 |
| 40019 | MIR-99B*: HSA-MIR-99B*; MMU-MIR-99B*; RNO-MIR-99B*            | -0.386098991  | 0 | 0 |
| 40021 | MIR-100*: HSA-MIR-100*                                        | 0.183555381   | 0 | 0 |
| 40023 | MIR-34A*: HSA-MIR-34A*; MMU-MIR-34A*; RNO-MIR-34A*            | -0.399543917  | 0 | 0 |
| 40024 | MIR-33*: HSA-MIR-33A*; MMU-MIR-33*; RNO-MIR-33*               | -0.221966588  | 0 | 0 |
| 40025 | MIR-32*: HSA-MIR-32*; MMU-MIR-32*; RNO-MIR-32*                | -0.457356158  | 0 | 0 |
| 40026 | MIR-941: HSA-MIR-941                                          | -0.249888651  | 0 | 0 |
| 40030 | MIR-15A*: HSA-MIR-15A*                                        | -0.424717921  | 0 | 0 |
| 40031 | MIR-431*: HSA-MIR-431*; MMU-MIR-431*                          | 0.039879405   | 0 | 0 |
| 40033 | MIR-101*: HSA-MIR-101*                                        | -0.16559071   | 0 | 0 |
| 40035 | MIR-136*: HSA-MIR-136*; RNO-MIR-136*; MMU-MIR-136*            | -0.028530828  | 0 | 0 |
| 40036 | MIR-200B*: HSA-MIR-200B*; MMU-MIR-200B*                       | -0.260908812  | 0 | 0 |
| 40037 | MIR-141*: HSA-MIR-141*                                        | -0.287186973  | 0 | 0 |
| 40042 | MIR-16-1*: HSA-MIR-16-1*                                      | -0.408501113  | 0 | 0 |
| 40049 | MIR-106B*: HSA-MIR-106B*; MMU-MIR-106B*; RNO-MIR-106B*        | 0.524923073   | 0 | 0 |
| 40055 | EBV-MIR-BART7*: EBV-MIR-BART7*                                | -0.343400798  | 0 | 0 |
| 40056 | MIR-26B*: HSA-MIR-26B*; MMU-MIR-26B*; RNO-MIR-26B*            | -0.414821489  | 0 | 0 |
| 40062 | MIR-196A*: HSA-MIR-196A*; MMU-MIR-196A-2*; RNO-MIR-196A*      | -0.300782381  | 0 | 0 |
| 40065 | MIR-200C*: HSA-MIR-200C*; MMU-MIR-200C*; RNO-MIR-200C*        | 0.188699155   | 0 | 0 |
| 40066 | MIR-223*: HSA-MIR-223*; MMU-MIR-223*; RNO-MIR-223*            | -0.45055507   | 0 | 0 |
| 40070 | LET-7A*: LET-7C-2*; MMU-LET-7A-1*; MMU-LET-7C-2*; HSA-LET-7A* | -0.414958201  | 0 | 0 |
| 40071 | LET-7F-1*: MMU-LET-7F-1*; HSA-LET-7F-1*; RNO-LET-7F-1*        | -0.498327279  | 0 | 0 |
| 40072 | LET-7F-2*: HSA-LET-7F-2*; MMU-LET-7F-2*; RNO-LET-7F-2*        | -0.289672684  | 0 | 0 |
| 40075 | MIR-222*: HSA-MIR-222*; MMU-MIR-222*; RNO-MIR-222*            | -0.127690855  | 0 | 0 |
| 40076 | MIR-452*: HSA-MIR-452*                                        | 0.178981382   | 0 | 0 |
| 40077 | MIR-155*: HSA-MIR-155*                                        | -0.043804107  | 0 | 0 |
| 40080 | MIR-943: HSA-MIR-943                                          | -0.438237603  | 0 | 0 |
| 40081 | MIR-106A*: HSA-MIR-106A*                                      | -0.305454541  | 0 | 0 |
| 40082 | MIR-192*: HSA-MIR-192*                                        | -0.271855512  | 0 | 0 |
| 40083 | LET-7I*: HSA-LET-7I*; MMU-LET-7I*; RNO-LET-7I*                | 0.204598889   | 0 | 0 |
| 40090 | MIR-29B-2*: HSA-MIR-29B-2*; RNO-MIR-29B-2*; MMU-MIR-29B-2*    | -0.389693659  | 0 | 0 |
| 40093 | MIR-744*: HSA-MIR-744*; MMU-MIR-744*                          | -0.294877666  | 0 | 0 |
| 40094 | MIR-374B*: 374C*: HSA-MIR-374B*; MMU-MIR-374C*                | -0.418423325  | 0 | 0 |
| 40096 | MIR-30D*: HSA-MIR-30D*; RNO-MIR-30D*                          | -0.151359363  | 0 | 0 |
| 40100 | MIR-922: HSA-MIR-922                                          | -0.161145138  | 0 | 0 |
| 40101 | EBV-MIR-BART10*: EBV-MIR-BART10*                              | -0.420267286  | 0 | 0 |
| 40102 | MIR-186*: HSA-MIR-186*; RNO-MIR-186*                          | -0.242459577  | 0 | 0 |
| 40107 | MIR-138-2*: HSA-MIR-138-2*; MMU-MIR-138-2*; RNO-MIR-138-2*    | 0.480264466   | 0 | 0 |
| 40111 | MIR-29B-1*: HSA-MIR-29B-1*; MMU-MIR-29B-1*                    | 0.243593617   | 0 | 0 |
| 40115 | MIR-145*: HSA-MIR-145*; MMU-MIR-145*; RNO-MIR-145*            | -0.12783571   | 0 | 0 |
| 40119 | MIR-920: HSA-MIR-920                                          | -0.349363677  | 0 | 0 |
| 40133 | MIR-411*: HSA-MIR-411*; MMU-MIR-411*; RNO-MIR-411*            | 0.107440701   | 0 | 0 |
| 40140 | HCMV-MIR-US25-1*: HCMV-MIR-US25-1*                            | -0.242281354  | 0 | 0 |
| 40145 | MIR-589: HSA-MIR-589                                          | -0.168596003  | 0 | 0 |
| 40149 | MIR-24-2*: HSA-MIR-24-2*                                      | -0.110979218  | 0 | 0 |
| 40150 | MIR-214*: HSA-MIR-214*; MMU-MIR-214*                          | 0.385586654   | 0 | 0 |
| 40152 | MIR-31*: MMU-MIR-31*; HSA-MIR-31*                             | -0.207176214  | 0 | 0 |
| 40154 | HSV1-MIR-H1: HSV1-MIR-H1                                      | -0.361281928  | 0 | 0 |
| 40161 | MIR-541-3P: HSA-MIR-541                                       | -0.067873542  | 0 | 0 |
| 40196 | MIR-182_2: HSA-MIR-182 (ALTERNATIVE MATURE SEQUENCE)          | -0.298688128  | 0 | 0 |
| 40220 | MIR-1227: HSA-MIR-1227                                        | -0.419260666  | 0 | 0 |
| 40224 | MIR-1231: HSA-MIR-1231                                        | -0.442502931  | 0 | 0 |
| 40229 | MIR-1238: HSA-MIR-1238                                        | -0.290323335  | 0 | 0 |
| 40230 | MIR-513B: HSA-MIR-513B                                        | -0.3016340176 | 0 | 0 |
| 40287 | MIR-1178: HSA-MIR-1178                                        | -0.278429529  | 0 | 0 |
| 40288 | MIR-1179: HSA-MIR-1179                                        | -0.436691124  | 0 | 0 |
| 40319 | MIR-1244: HSA-MIR-1244                                        | -0.353877411  | 0 | 0 |
| 40321 | MIR-1246: HSA-MIR-1246                                        | -0.199304121  | 0 | 0 |
| 40326 | MIR-1251: HSA-MIR-1251                                        | 0.343613174   | 0 | 0 |
| 40330 | MIR-1255A: HSA-MIR-1255A                                      | -0.322634481  | 0 | 0 |
| 40331 | MIR-1255B: HSA-MIR-1255B                                      | -0.383151224  | 0 | 0 |
| 40336 | MIR-1260: HSA-MIR-1260                                        | 0.335502928   | 0 | 0 |
| 40337 | MIR-1261: HSA-MIR-1261                                        | 0.189726613   | 0 | 0 |
| 40338 | MIR-1262: HSA-MIR-1262                                        | -0.373231606  | 0 | 0 |
| 40339 | MIR-1263: HSA-MIR-1263                                        | 0.053637814   | 0 | 0 |
| 40340 | MIR-1264: HSA-MIR-1264                                        | -0.475900767  | 0 | 0 |
| 40342 | MIR-1269: HSA-MIR-1269                                        | 0.469890732   | 0 | 0 |
| 40345 | MIR-1269: HSA-MIR-1269                                        | -0.450031171  | 0 | 0 |
| 40347 | MIR-1271: HSA-MIR-1271                                        | -0.196537218  | 0 | 0 |
| 40357 | MIR-1280: HSA-MIR-1280                                        | -0.387166459  | 0 | 0 |
| 40364 | MIR-1287: HSA-MIR-1287                                        | 0.208302874   | 0 | 0 |
| 40367 | MIR-1290: HSA-MIR-1290                                        | -0.381831302  | 0 | 0 |
| 40374 | MIR-1297: HSA-MIR-1297                                        | -0.090758987  | 0 | 0 |
| 40375 | MIR-1298: HSA-MIR-1298                                        | -0.322304049  | 0 | 0 |
| 40380 | MIR-1302: HSA-MIR-1302                                        | -0.398172051  | 0 | 0 |
| 40384 | MIR-1306-3P: HSA-MIR-1306; MMU-MIR-1306-3P                    | -0.25160611   | 0 | 0 |
| 40388 | MIR-1322: HSA-MIR-1322                                        | 0.018556784   | 0 | 0 |
| 40394 | MIR-302E: HSA-MIR-302E                                        | -0.300746836  | 0 | 0 |
| 40396 | MIR-320B: HSA-MIR-320B                                        | 0.971302627   | 0 | 0 |
| 40397 | MIR-320C: HSA-MIR-320C                                        | 1.157342531   | 0 | 0 |
| 40404 | MIR-548E: HSA-MIR-548E                                        | -0.4923144472 | 0 | 0 |
| 40406 | MIR-548H: HSA-MIR-548H                                        | -0.431073146  | 0 | 0 |
| 40407 | MIR-548I: HSA-MIR-548I                                        | -0.2859304    | 0 | 0 |
| 40408 | MIR-548J: HSA-MIR-548J                                        | -0.416445656  | 0 | 0 |
| 40409 | MIR-548K: HSA-MIR-548K                                        | -0.3562176    | 0 | 0 |
| 40410 | MIR-548L: HSA-MIR-548L                                        | -0.434043537  | 0 | 0 |
| 40411 | MIR-548M: HSA-MIR-548M                                        | -0.157127714  | 0 | 0 |
| 40415 | MIR-663B: HSA-MIR-663B                                        | -0.332595832  | 0 | 0 |
| 40417 | MIR-664-5P: HSA-MIR-664*                                      | -0.393526405  | 0 | 0 |
| 40428 | MIR-1468: HSA-MIR-1468                                        | -0.402828366  | 0 | 0 |
| 40432 | MIR-1537: HSA-MIR-1537                                        | -0.378773124  | 0 | 0 |
| 40439 | MIR-1911: HSA-MIR-1911                                        | -0.300795092  | 0 | 0 |
| 40441 | MIR-1912: HSA-MIR-1912                                        | -0.290220381  | 0 | 0 |
| 40468 | HSV1-MIR-H3: HSV1-MIR-H3                                      | -0.333076476  | 0 | 0 |
| 40469 | HSV1-MIR-H4: HSV1-MIR-H4                                      | -0.278298607  | 0 | 0 |
| 40470 | HSV1-MIR-H4*: HSV1-MIR-H4*                                    | -0.347591386  | 0 | 0 |
| 40471 | HSV1-MIR-H5-3P: HSV1-MIR-H5-3P                                | -0.464107114  | 0 | 0 |
| 40474 | JCV-MIR-J1-3P-BKV-MIR-B1-3P: JCV-MIR-J1-3P; BKV-MIR-B1-3P     | -0.45481621   | 0 | 0 |
| 40478 | MIR-196B*: HSA-MIR-196B*; RNO-MIR-196B*                       | -0.102696969  | 0 | 0 |
| 40479 | MIR-1972: HSA-MIR-1972                                        | -0.105411791  | 0 | 0 |
| 40480 | MIR-1973: HSA-MIR-1973                                        | 0.82155697    | 0 | 0 |
| 40483 | MIR-1978: HSA-MIR-1978                                        | 0.388443573   | 0 | 0 |
| 40487 | MIR-205*: HSA-MIR-205*                                        | -0.081632921  | 0 | 0 |
| 40488 | MIR-2052: HSA-MIR-2052                                        | -0.178030262  | 0 | 0 |
| 40489 | MIR-2053: HSA-MIR-2053                                        | -0.485176907  | 0 | 0 |
| 40495 | MIR-449B*: HSA-MIR-449B*                                      | 0.20362856    | 0 | 0 |
| 40558 | EBV-MIR-BART4*: EBV-MIR-BART4*                                | -0.030010857  | 0 | 0 |
| 40562 | HSV2-MIR-H4-3P: HSV2-MIR-H4-3P                                | -0.119107239  | 0 | 0 |
| 40563 | HSV2-MIR-H4-5P: HSV2-MIR-H4-5P                                | -0.403208148  | 0 | 0 |
| 41415 | MIR-2114: HSA-MIR-2114                                        | -0.311213503  | 0 | 0 |
| 41420 | MIR-2116*: HSA-MIR-2116*                                      | -0.4606188    | 0 | 0 |
| 41421 | MIR-2117: HSA-MIR-2117                                        | -0.260293881  | 0 | 0 |
| 41422 | MIR-2276: HSA-MIR-2276                                        | -0.498440704  | 0 | 0 |
| 41423 | MIR-2277-3P: HSA-MIR-2277-3P                                  | -0.46061183   | 0 | 0 |
| 41425 | MIR-449C: HSA-MIR-449C                                        | 0.004983667   | 0 | 0 |
| 41426 | MIR-449C*: HSA-MIR-449C*                                      | -0.374102568  | 0 | 0 |
| 41427 | MIR-548Q: HSA-MIR-548Q                                        | -0.427609648  | 0 | 0 |
| 41428 | MIR-670: HSA-MIR-670                                          | 0.38611387    | 0 | 0 |
| 41432 | MIR-764: HSA-MIR-764                                          | -0.378000676  | 0 | 0 |
