# Supplementary material for: Ewing’s Sarcoma: An Analysis of miRNA Expression Profiles and Target Genes in Paraffin-Embedded Primary Tumor Tissue
Source: MDPI journal article supplement (doi:10.3390/ijms17050656), 2016-04-30
Supplement: s1 [file s1]

# Supplementary Materials: Ewing's Sarcoma: An Analysis of miRNA Expression Profiles and Target Genes in Paraffin-Embedded Primary Tumor Tissue

Antonina Parafioriti, Caterina Bason, Elisabetta Armiraglio, Lucia Calciano, Primo Andrea Daolio, Martina Berardocco, Andrea Di Bernardo, Alessia Colosimo, Roberto Luksch and Anna C. Berardi

**Table S1.** Analysis of the change in expression of 954 miRNAs in 20 ES biopsies compared to MSCs from 4 normal donors. (Miltenyi Biotec).

**Table S2.** Analysis of the change in expression of 954 miRNAs in 20 ES biopsies compared to MSCs from 4 normal donors. 58 miRNAs which are suitable for further evaluation ( $p$ -value  $\leq 0.05$  was considered statistically-significant) are highlighted in yellow.

**Table S3.** Functional analysis [KEGG Pathway Enrichment] [Gene Ontology Enrichment].

| Target Gene   | Description                                                   | Target Gene     | Description                                                                                            |
|---------------|---------------------------------------------------------------|-----------------|--------------------------------------------------------------------------------------------------------|
| <i>CDC34</i>  | cell division cycle 34 homolog                                | <i>JAK1</i>     | Janus kinase 1                                                                                         |
| <i>CDC25A</i> | cell division cycle 25 homolog A                              | <i>MAP2K1</i>   | mitogen-activated protein kinase kinase 1                                                              |
| <i>CCND1</i>  | Cyclin D1                                                     | <i>COL1A1</i>   | Collagen, type I, alpha 1                                                                              |
| <i>EWSR1</i>  | Ewing sarcoma breakpoint region 1                             | <i>SP1</i>      | Sp1 transcription factor                                                                               |
| <i>NF2</i>    | neurofibromin 2 (merlin)                                      | <i>MCL1</i>     | myeloid cell leukemia sequence 1 (BCL2-related)                                                        |
| <i>KRAS</i>   | Kirsten rat sarcoma viral oncogene homolog                    | <i>TCL1A</i>    | T-cell leukemia/lymphoma 1A                                                                            |
| <i>E2F2</i>   | E2F transcription factor 2                                    | <i>ARHGD1A</i>  | Rho GDP dissociation inhibitor (GDI) alpha                                                             |
| <i>IL6</i>    | Interleukin 6 (Interferon, Beta 2)                            | <i>NKRF</i>     | NFkB repressing factor                                                                                 |
| <i>CCR7</i>   | chemokine (C-C motif) receptor 7                              | <i>MEOX2</i>    | mesenchyme homeobox 2                                                                                  |
| <i>BCL2</i>   | B-cell CLL/lymphoma 2                                         | <i>RUNX3</i>    | runt-related transcription factor 3                                                                    |
| <i>HMGA2</i>  | High mobility group AT-hook 2                                 | <i>PTEN</i>     | phosphatase and tensin homolog                                                                         |
| <i>HMGA1</i>  | High mobility group AT-hook 1.                                | <i>BMI1</i>     | BMI1 polycomb ring finger oncogene                                                                     |
| <i>MYC</i>    | V-myc myelocytomatosis viral oncogene homolog (avian)         | <i>TGFBR1</i>   | transforming growth factor, beta receptor 1                                                            |
| <i>CDKN2A</i> | Cyclin-dependent kinase inhibitor 2A                          | <i>FBXW7</i>    | F-box and WD repeat domain containing 7, E3 ubiquitin protein ligase                                   |
| <i>BCL2L1</i> | B-cell CLL/lymphoma 2-LIKE PROTEIN 1                          | <i>TCL1A</i>    | T-cell leukemia/lymphoma 1A                                                                            |
| <i>COL1A2</i> | collagen, type I, alpha 2                                     | <i>HOXC8</i>    | homeobox C8                                                                                            |
| <i>HOXA5</i>  | homeobox A5                                                   | <i>IKBK8</i>    | inhibitor of kappa light polypeptide gene enhancer in B-cells, kinase beta                             |
| <i>RUNX3</i>  | Runt related transcription factor 3                           | <i>HIF1A</i>    | hypoxia inducible factor 1, alpha subunit (basic helix-loop-helix transcription factor)                |
| <i>PPARG</i>  | peroxisome proliferator-activated receptor gamma              | <i>CAV1</i>     | caveolin 1, caveolae protein, 22 kDa                                                                   |
| <i>CDKN1B</i> | cyclin-dependent kinase inhibitor 1B (p27, Kip1)              | <i>ERBB2</i>    | v-erb-b2 erythroblastic leukemia viral oncogene homolog 2, neuro/glioblastoma derived oncogene homolog |
| <i>RNF2</i>   | ring finger protein 2                                         | <i>GSK3B</i>    | glycogen synthase kinase 3 beta                                                                        |
| <i>RALA</i>   | v-ral simian leukemia viral oncogene homolog A (ras related)  | <i>JAG1</i>     | jagged 1                                                                                               |
| <i>WEE1</i>   | WEE1 homolog (S. pombe)                                       | <i>MET</i>      | met proto-oncogene (hepatocyte growth factor receptor)                                                 |
| <i>E2F3</i>   | E2F transcription factor 3                                    | <i>CD44</i>     | CD44 molecule (Indian blood group)                                                                     |
| <i>CDK6</i>   | cyclin-dependent kinase 6                                     | <i>MTOR</i>     | mechanistic target of rapamycin (serine/threonine kinase)                                              |
| <i>RUNX2</i>  | Runt-Related Transcription Factor 2                           | <i>SOD2</i>     | superoxide dismutase 2, mitochondrial                                                                  |
| <i>RAF1</i>   | v-raf-1 murine leukemia viral oncogene homolog 1              | <i>MMP1</i>     | matrix metalloproteinase 1 (interstitial collagenase)                                                  |
| <i>SOX5</i>   | SRY (sex determining region Y)-box 5                          | <i>CDKN1C</i>   | cyclin-dependent kinase inhibitor 1C (p57, Kip2)                                                       |
| <i>E2F1</i>   | E2F transcription factor 1                                    | <i>TMED7</i>    | transmembrane emp24 protein transport domain containing 7                                              |
| <i>PTEN</i>   | phosphatase and tensin homolog                                | <i>DNMT3A</i>   | DNA (cytosine-5-)-methyltransferase 3 alpha                                                            |
| <i>TGFBR2</i> | transforming growth factor, beta receptor II (70/80 kDa)      | <i>DNMT3B</i>   | DNA (cytosine-5-)-methyltransferase 3 beta                                                             |
| <i>TIMP3</i>  | TIMP metalloproteinase inhibitor 3                            | <i>COL4A2</i>   | collagen, type IV, alpha 2                                                                             |
| <i>PDCD4</i>  | programmed cell death 4 (neoplastic transformation inhibitor) | <i>COL4A1</i>   | collagen, type IV, alpha 1                                                                             |
| <i>FGFRL1</i> | fibroblast growth factor receptor-like 1                      | <i>PPM1D</i>    | protein phosphatase, Mg2+/Mn2+ dependent, 1D                                                           |
| <i>BDNF</i>   | brain-derived neurotrophic factor                             | <i>PIK3R1</i>   | phosphoinositide-3-kinase, regulatory subunit 1 (alpha)                                                |
| <i>PTPN1</i>  | protein tyrosine phosphatase, non-receptor type 1             | <i>SPARC</i>    | secreted protein, acidic, cysteine-rich (osteonectin)                                                  |
| <i>ISCU</i>   | iron-sulfur cluster scaffold homolog ( <i>E. coli</i> )       | <i>SERPINB9</i> | serpin peptidase inhibitor, clade B (ovalbumin), member 9                                              |

Table S3. Cont.

| Target Gene    | Description                                                            | Target Gene   | Description                                                |
|----------------|------------------------------------------------------------------------|---------------|------------------------------------------------------------|
| <i>POU4F2</i>  | POU class 4 homeobox 2                                                 | <i>MYBL2</i>  | v-myb myeloblastosis viral oncogene homolog (avian)-like 2 |
| <i>IL6R</i>    | interleukin 6 receptor                                                 | <i>NOTCH1</i> | Neurogenic locus notch homolog protein 1                   |
| <i>MYH1</i>    | myosin, heavy chain 1, skeletal muscle, adult                          | <i>CDK4</i>   | Cyclin-dependent kinase 4                                  |
| <i>MYH2</i>    | myosin, heavy chain 2, skeletal muscle, adult                          | <i>NOTCH2</i> | Neurogenic locus notch homolog protein 2                   |
| <i>MYH4</i>    | myosin, heavy chain 4, skeletal muscle                                 | <i>PDGFRA</i> | platelet-derived growth factor receptor, alpha polypeptide |
| <i>FOXO1</i>   | Forkhead box O1                                                        | <i>MAP3K9</i> | mitogen-activated protein kinase kinase kinase 9           |
| <i>PHB</i>     | prohibitin                                                             | <i>IGF1R</i>  | insulin-like growth factor 1 receptor                      |
| <i>SPRY2</i>   | sprouty homolog 2                                                      | <i>ACVR1C</i> | activin A receptor, type IC                                |
| <i>IGF1</i>    | insulin-like growth factor 1 (somatomedin C)                           | <i>GRB2</i>   | growth factor receptor-bound protein 2                     |
| <i>ST14</i>    | suppression of tumorigenicity 14 (colon carcinoma)                     | <i>CDC42</i>  | cell division cycle 42 (GTP binding protein, 25 kDa)       |
| <i>CCNT1</i>   | cyclin T1                                                              | <i>OSCP1</i>  | organic solute carrier partner 1                           |
| <i>MMP13</i>   | matrix metalloproteinase 13 (collagenase 3)                            | <i>SOX2</i>   | SRY (sex determining region Y)-box 2                       |
| <i>CYP1B1</i>  | Cytochrome P450 1B1                                                    | <i>SP2</i>    | Sp2 transcription factor                                   |
| <i>BCL6</i>    | B-cell CLL/lymphoma 6                                                  | <i>JUNB</i>   | jun B proto-oncogene                                       |
| <i>SOCS1</i>   | suppressor of cytokine signaling 1                                     | <i>JUND</i>   | jun D proto-oncogene                                       |
| <i>SNAI1</i>   | snail homolog 1                                                        | <i>TGFB1</i>  | transforming growth factor, beta 1                         |
| <i>UBE2I</i>   | ubiquitin-conjugating enzyme E2I                                       | <i>MECP2</i>  | methyl CpG binding protein 2 (Rett syndrome)               |
| <i>KIT</i>     | V-Kit Hardy-Zuckerman 4 Feline Sarcoma Viral Oncogene Homolog          | <i>TJP1</i>   | tight junction protein 1                                   |
| <i>PDGFB</i>   | Platelet-derived growth factor beta polypeptide                        | <i>PTCH1</i>  | patched 1                                                  |
| <i>ATXN1</i>   | ataxin 1                                                               | <i>MEF2C</i>  | myocyte enhancer factor 2C                                 |
| <i>BMPR2</i>   | bone morphogenetic protein receptor, type II (serine/threonine kinase) | <i>NFIA</i>   | nuclear factor I/A                                         |
| <i>TLR2</i>    | toll-like receptor 2                                                   | <i>FOXO1</i>  | forkhead box O1                                            |
| <i>CDKN1A</i>  | Cyclin-dependent kinase inhibitor 1A (p21, Cip1)                       | <i>PARP1</i>  | poly (ADP-ribose) polymerase 1                             |
| <i>RB1</i>     | Retinoblastoma 1                                                       | <i>RUNX1</i>  | runt-related transcription factor 1                        |
| <i>TCEAL1</i>  | transcription elongation factor A (SII)-like 1                         | <i>CALN1</i>  | calneuron 1                                                |
| <i>BCL2L11</i> | BCL2-like 11 (apoptosis facilitator)                                   | <i>TGFB1</i>  | transforming growth factor, beta-induced, 68 kDa           |

**Table S4.** Target Gene prediction of deregulated miRNAs.

| miRNA      | Target Gene       |
|------------|-------------------|
| miR-937    | CPOX. DCAF8. GLUL |
| miR-1303   | SOAT. FHOD3. CDK6 |
| miR-1908   | COX2. COQ4. ATP6  |
| miR-1915 * | PTCDI. WDR33      |
| miR-762    | AMD1              |
| miR-379    | IL11              |
| miR-1286   | U/I               |
| miR-1275   | U/I               |
| miR-665    | U/I               |
| miR-602    | U/I               |
| miR-1248   | U/I               |

\* From miRTarBase prediction tool (less or no evidence).

**Table S5.** Summary of chromosomal loci of deregulated miRNAs in ES tissue.

| Chromosomal Locus | miRNA       | up/down |
|-------------------|-------------|---------|
| 11q23.1           | miR-34c-3p  | down    |
| 11p15.5           | miR-210     | up      |
| 11q12.1           | miR-130a    | up      |
| 11p15.5           | miR-675     | down    |
| 11                | miR-1908    | down    |
| 22q13.31          | LET-7B      | up      |
| 22q13.1           | miR-659     | down    |
| 22                | miR-1286    | down    |
| 19p13.13          | miR-27a     | up      |
| 19p13.13          | miR-23a     | up      |
| 19p13.2           | miR-199b-3p | up      |
| 19p13.2           | miR-199a-5p | up      |
| 19p13.2           | miR-638     | down    |
| 19q13.32          | miR-330-3p  | down    |
| 19q13.41          | LET-7E      | up      |
| 17p13.1           | miR-195     | up      |
| 17p13.1           | miR-497     | up      |
| 17p13.3           | miR-212     | down    |
| 17q21.32          | miR-196a    | up      |
| 17q22             | miR-301a    | up      |
| 17q23.1           | miR-21      | up      |
| 9q22.32           | LET-7F      | up      |
| 9q22.32           | miR-27b     | up      |
| 9q22.32           | LET-7A      | up      |
| 9q34.3            | miR-602     | down    |
| 8q24.3            | miR-937     | down    |
| 8q24.22           | miR-30b     | up      |
| 8                 | miR-151-5p  | up      |
| 1p36.22           | miR-34a     | up      |
| 1p34.2            | miR-30e     | up      |
| 1q32.1            | miR-181a    | up      |
| 1q32.1            | miR-181b    | up      |

**Table S6.** miRXplore™ Microarrays: 954 microRNAs probe-sequence.

**Table S7.** TaqMan® MicroRNA Human Assays form Applied biosystem used in this study.

| miRNA        | AB Assay ID | Target Sequence (5'–3')                 |
|--------------|-------------|-----------------------------------------|
| hsa-miR-181b | 1098        | AACAUUCAUUGCUGUCGGUGGG                  |
| hsa-miR-1915 | 121111_mat  | CCCCAGGGCGACGCGGCGGG                    |
| hsa-miR-1275 | 2840        | GUGGGGGAGAGGCUGUC                       |
| RNU6B        | 1093        | CGCAAGGAUGACACGCAAUUCGUGAAGCGUCCAUUUUUU |
